1

2

3 **Cortical circuits for goal-directed cross-modal transfer learning**

4

5 Maëlle Guyoton<sup>1†</sup>, Giulio Matteucci<sup>1†</sup>, Charlie G. Foucher<sup>1</sup> & Sami El-Boustani<sup>1\*</sup>

6

7 <sup>1</sup> Department of Basic Neurosciences, Faculty of Medicine, University of Geneva, 1

8 Rue Michel-Servet, 1206 Geneva, Switzerland.

9

10 \* Corresponding author e-mail: Sami El-Boustani ([sami.el-boustani@unige.ch](mailto:sami.el-boustani@unige.ch))

11

12 † These authors contributed equally to this work.

13 **Abstract**

14 In an environment full of complex multisensory stimuli, flexible and effective behaviors  
15 rely on our ability to transfer learned associations across sensory modalities. Here we  
16 explored the intertwined cortical representations of visual and whisker tactile  
17 sensations in mice and their role in cross-modal transfer learning. Mice trained to  
18 discriminate stimulations of two different whiskers seamlessly switched to the  
19 discrimination of two visual cues only when reward contingencies were spatially  
20 congruent across modalities. Using multi-scale calcium imaging over the dorsal cortex,  
21 we identified two distinct associative domains within the ventral and dorsal streams  
22 displaying visuo-tactile integration. We observed multimodal spatial congruency in  
23 visuo-tactile areas, both functionally and anatomically, for feedforward and feedback  
24 projections with primary sensory regions. Single-cell responses in these domains were  
25 tuned to congruent visuo-tactile stimuli. Suppressing synaptic transmission specifically  
26 in the dorsal stream impaired transfer learning. Our results delineate the pivotal  
27 cortical pathway necessary for visuo-tactile multisensory integration and goal-directed  
28 cross-modal transfer learning.

29

30 **One Sentence Summary:** Spatially organized representations of visual and tactile  
31 inputs in associative cortical areas facilitate effective cross-modal transfer following  
32 goal-directed sensorimotor learning.

33

34 **Keywords:** Multisensory integration, Associative cortices, Learning, Mice, Calcium  
35 imaging, Visual system, Somatosensory system, Cross-modal transfer, Goal-  
36 directed behavior

## 37 **Introduction**

38           Objects and events in the environment possess distinct physical properties,  
39 detectable through various sensory modalities. Specific brain circuits perform  
40 multisensory integration, resulting in a unified perception of these properties. Stimuli  
41 originating from the same spatial location and occurring simultaneously are likely to  
42 be attributed to a common cause (1). This is particularly true for the visual and haptic  
43 senses that share common inputs in the peri-personal space. Consequently, one can  
44 immediately recognize by visual inspection an object previously explored only by touch.  
45 This phenomenon is referred to as cross-modal object recognition and has been the  
46 focus of extensive studies in non-human primates and rodents (2).

47           Cross-modal transfer learning occurs when object or event recognition enables  
48 generalization of a learned behavior from one modality to another modality. Cross-  
49 modal transfer learning has been reported in rats for intensity or duration  
50 discrimination of auditory and visual stimuli (3–6). Additionally, lesions of the posterior  
51 parietal cortex in rats indicate that cross-modal transfer learning based on spatial  
52 information is impaired (7) and that cross-modal object recognition based on visual or  
53 tactile information during spontaneous exploration is abolished (8). Yet, the intricate  
54 functional organization underpinning these cognitive faculties still stands elusive.

55           Specialized brain regions generate multimodal representations, with aligned  
56 functional organizations for specific sensory features. Such architecture enables the  
57 nervous system to flexibly adapt to changing or noisy sensory scenes. Multisensory  
58 integration in the superior colliculus guides reflexive behaviors such as gaze and head  
59 orienting by augmenting the saliency of multisensory events via aligned topographic  
60 spatial representations of visual, auditory, and tactile stimuli (9, 10). In contrast, cortical

61 circuits play a central role in conscious perception and goal-directed behaviors.  
62 Neuroanatomical investigations in monkeys have indicated that multisensory  
63 integration might take place at various levels of the cortical processing hierarchy,  
64 including bidirectional interactions between early and late stages of processing (11,  
65 12). Yet, the challenge lies in systematically characterizing these circuits at large  
66 scales while maintaining cellular resolution and linking their representations to  
67 behavior.

68 The mouse model offers powerful tools for dissecting circuits involved in  
69 multisensory integration and their contributions to behavioral outputs (13–15). Mice  
70 use tactile sensations transmitted by their large whiskers on the snout to explore their  
71 immediate surroundings. They rely on visuo-tactile information for detecting and  
72 crossing gaps (16), navigating in confined spaces (17), and recognizing object  
73 features (18). Given that whiskers occupy a significant part of the visual field, these  
74 two systems receive numerous concomitant inputs. The integration of whisker and  
75 visual information has been reported in the superior colliculus (19–21) and in RL, an  
76 associative cortical area rostral-lateral to V1 (22, 23). RL is part of a network of higher-  
77 visual areas situated between the primary visual and somatosensory cortex, some of  
78 which belong to the posterior parietal cortex known for its role in spatial reasoning in  
79 humans (24, 25). Nonetheless, the interaction between the anatomical and functional  
80 organization of cortical areas for visuo-tactile processing, and their potential role in  
81 cross-modal transfer learning, remains unresolved. In this study, we investigate these  
82 circuits in mice performing goal-directed behaviors.

83

84

## 85 **Results**

86           We designed a behavioral paradigm to test the ability of mice to transfer whisker  
87 sensorimotor associations they had previously learned to the visual modality, using a  
88 common spatial feature of stimuli (Fig. 1A). In the dark, head-fixed and water-restricted  
89 mice were first trained on a Go/No go tactile task, where they discriminated between  
90 two whiskers from the same column on the whisker pad, positioned along the ventro-  
91 dorsal axis of the snout. Mice could obtain a drop of water reward if they licked a spout  
92 upon stimulation of the top (B2) whisker whereas they were punished with a 10-  
93 second-long timeout if they licked for the bottom (C2) whisker. Once mice became  
94 expert at the task, performing stably with high percentage of correct trials over at least  
95 3 consecutive sessions, we switched the task to a Go/No go visual discrimination task.  
96 In this condition we replaced top and bottom whisker stimulations along the rostro-  
97 caudal direction by black squares on a gray background drifting along the rostro-  
98 caudal direction. The screen was oriented to be centered and parallel to the right retina  
99 on the same side where the whisker stimulations were delivered. The locations of the  
100 moving square along the vertical axis were chosen to roughly match the locations of  
101 the whiskers on the visual field (see Methods).

102           To evaluate whether mice use spatial information from the tactile task to infer  
103 reward contingencies in the visual task, we examined two specific scenarios. In a  
104 cohort of mice, the visual stimulus that is spatially congruent with the whisker stimulus  
105 remained associated to a reward resulting in congruent reward contingencies. For  
106 other mice, we changed the rule after the switch and rewarded responses for the  
107 bottom stimulus resulting in incongruent reward contingences between the two  
108 modalities (Fig. 1B). After modality switch with congruent reward contingencies, we  
109 observed that mice immediately continued to perform the task with licking responses

110 and performance comparable to the previous session where whiskers were stimulated  
111 in the dark (Fig. 1C-D). When reward contingencies were spatially incongruent, mice  
112 initially attempted to lick for both stimuli. In some cases, this led to performance  
113 dropping below chance levels. Eventually, mice began to disengage from the task,  
114 ceasing any licking behavior in response to sensory stimuli (Fig. 1E-F). Mice strongly  
115 resisted engaging with this task, even if we manually delivered water drops, which  
116 typically induced prolonged licking bouts due to their heightened thirst-driven  
117 motivation. This suggests that mice manifest a conflicting prior regarding task rules  
118 rather than an insufficient motivational drive to perform the task. This was confirmed  
119 at the population level where we observed a characteristic behavior across all mice  
120 showing either a seamless transfer learning in the congruent case (Fig. 1G) or  
121 resistance to perform the task over several days in the incongruent case (Fig. 1H). We  
122 confirmed that this result was not caused by a biased preference for the top whisker  
123 or top visual stimulus by performing the same experiments with cohorts of mice trained  
124 to respond to the bottom whisker. Similar behavioral responses were observed, with  
125 mice performing normally after the switch with congruent reward contingencies but not  
126 when contingencies were spatially incongruent (Fig. 1I-J).

127 We further assessed if mice could equally transfer learning when they were  
128 trained to the visual task first. We found that mice maintained task performance in  
129 congruent scenarios, but failed in incongruent ones, irrespective of the rewarded  
130 stimulus during the first task (Supplementary Fig. S1). However, we observed a small  
131 but significant drop of performance from visual to tactile tasks (Supplementary Fig.  
132 S1F) that was absent in the tactile to visual switch (Fig. 1I). This asymmetry might  
133 arise from generally higher initial performances in the visual task, the distinct nature

134 of sensory representation (discrete for whiskers and continuous for visual inputs), or  
135 variations in circuit properties.

136 Despite the limited visibility of the capillary glass tubes used for whisker  
137 stimulation, mice could potentially rely on visual cues to perform the tactile task,  
138 thereby generalizing within the visual domain instead of across sensory modalities.  
139 We carried out control experiments where mice proficient in whisker discrimination  
140 underwent sessions with whiskers temporarily removed from the tubes, and  
141 subsequently reintroduced. We found that the mice's performance in both detection  
142 and discrimination tasks dropped to chance levels immediately after the whiskers were  
143 removed from the capillary tubes. However, their performance recovered as soon as  
144 the whiskers were reintroduced in the stimulated tubes (Supplementary Fig. S2). This  
145 demonstrates that mice are not using visual cues to perform the whisker discrimination  
146 task in dark conditions.

147 Besides the transfer of knowledge regarding the congruent reward  
148 contingencies between modalities, mice could also potentially use acquired  
149 knowledge about Go/No go task structure to continue performing after the switch. To  
150 evaluate learning trajectories post-switch with prior Go/No go task experience, similar  
151 motivation levels but no spatial information, we trained mice on an auditory Go/No go  
152 task using pure tones (Fig. 1K). These tones bear no clear spatial relationship to the  
153 visual stimuli introduced after the modality switch. In this condition, performance  
154 dropped to chance level after the switch but steadily recovered to expert level over the  
155 next few days (Fig. 1L-M). This indicates that mice can learn the new task significantly  
156 faster when they have no prior on spatial reward contingencies compared to when  
157 they do (Fig. 1N). In the latter scenario, mice, when trained for longer durations, would

158 eventually perform again but often with lower performance (Supplementary Fig.  
159 S1E,G).

160 Finally, we compared our results with a situation where reward contingencies  
161 are switched within the tactile modality, as previously done in other studies (26, 27).  
162 After mice reached expert level, we reversed the reward contingencies between the  
163 two whiskers. We observed a stark drop in discrimination performance, significantly  
164 below chance levels, indicating that mice persist to perform the task following the  
165 original rule (Supplementary Fig. S3). Following the switch, task performance  
166 increased but remained below or at chance level for at least three consecutive days.  
167 This demonstrates that mice behave differently when reward contingencies switch  
168 occurs within the same sensory modality as opposed to across different modalities. In  
169 the former case, they continue to inflexibly produce the same sensorimotor  
170 transformation, likely reflecting ingrained habitual behaviors.

171 Together these results show that mice can swiftly and spontaneously transfer  
172 previously learned associations across sensory modalities leveraging on the spatial  
173 organization common to these senses. Conversely, mice display a pronounced  
174 resistance to re-learning when required to perform against the previously valid spatial  
175 rule. Cortical circuits are necessary for conscious perception and are believed to  
176 mediate goal-directed cross-modal transfer learning (2, 7). To pinpoint the cortical  
177 regions responsible for transferring spatial information between the visual and whisker  
178 somatosensory systems, we mapped the topographic representation of vertical space  
179 for both modalities in the dorsal cortex of transgenic mice expressing the calcium  
180 indicator GCaMP6f in cortical layer 2/3 (see Methods). We first used standard  
181 retinotopic and somatotopic mapping protocols (28, 29) to identify whisker responding  
182 and retinotopically organized cortical areas through a 5 mm diameter cranial window



183 over the posterior part of the dorsal cortex (Fig. 2A-B). Whisker response pattern and  
184 retinotopic sign maps could be used to precisely fit a projection of the Allen Mouse  
185 Brain Atlas (see Methods). We used this atlas to collectively register all the brains,  
186 enabling us to generate average whisker response maps (Fig. 2C) and retinotopic  
187 maps (Fig. 2D and Supplementary Fig. S4A-C), which corroborated the previously  
188 reported functional organization of higher visual areas (28). We observed that whisker  
189 stimulations evoked activity in several visually responsive associative areas including  
190 the anterior (A), rostro-lateral (RL), antero-lateral (AL) and latero-intermediate (LI)  
191 areas as well as other somatosensory areas indicating that whisker representations  
192 might be present in a more extended cortical network than previously reported (30).

193 To explore representations of the vertical spatial dimension during unisensory  
194 and multisensory stimulations, we designed a visuo-tactile sparse noise protocol (Fig.  
195 2E, see Methods). This protocol was first used to obtain retinotopic and somatotopic  
196 maps for elevation (vertical space) by computing preferred spatial position for each  
197 pixel. When we applied this approach to whisker stimuli, we identified the established  
198 somatotopic arrangement of the primary and secondary whisker somatosensory  
199 cortices, S1 and S2, which exhibit a topographic inversion at their boundary (Fig. 2F).  
200 Additionally, we observed organized somatotopic maps in the same associative visual  
201 areas (A, RL, AL and LI) as observed in Figure 2C. Strikingly, the map obtained with  
202 visual stimuli displayed a very similar organization in these associative areas as well  
203 as in the primary and secondary somatosensory cortices (Fig. 2G). The extended  
204 spatial representations evoked by visual or tactile stimuli were found consistently  
205 across mice with good cranial windows (Supplementary Fig. S4D). This suggests that  
206 spatially localized stimuli, whether evoked by visual or whisker tactile stimuli, might  
207 share a common representation, facilitating the mapping between sensory modalities,

208 as previously observed in the superior colliculus (20, 21). In particular, the spatial  
209 representations evoked by these two modalities displayed an angular offset that we  
210 estimated at 30 degrees by comparing the angle difference between elevation gradient  
211 vectors obtained from the maps (see Methods). This might represent the mouse's  
212 internal model of how whisker sensations align with their visual field.

213 We further investigated the properties of these representations by first  
214 computing a modality preference index to assess what sensory modality dominates  
215 each area (Fig. 2H). As expected, S1 and S2 were dominated by tactile inputs whereas  
216 primary visual cortex V1 was dominated by visual inputs. Interestingly, A, RL and the  
217 region at the border between AL and LI displayed a more balanced preference for both  
218 modalities though the lateral side was biased toward visual inputs and the medial side  
219 toward tactile inputs. In addition, we measured the spatial coherence between  
220 retinotopic and somatotopic elevation maps indicating how they locally correlate (Fig.  
221 2I, see Methods). This confirmed a widespread co-alignment across most associative  
222 areas in the belt separating V1 and S1. To compare multisensory responses triggered  
223 by visuo-tactile stimuli with unisensory responses, we computed a multisensory  
224 modulation index (see Methods) which compares multisensory responses against the  
225 maximal unisensory response on a pixel-by-pixel basis. These maps were obtained  
226 under visuo-tactile conditions, delaying the whisker stimuli by 0.15 seconds to ensure  
227 that the evoked responses in the cortex synchronized (Supplementary Fig. S4E-H),  
228 as also documented in previous studies (22, 23). The resulting map revealed a strong  
229 multisensory enhancement in visuo-tactile associative areas and in S2 (Fig. 2J)  
230 confirming that these areas display neural computation classically attributed to  
231 multisensory brain regions. More generally, we found that multisensory enhancement

232 was more pronounced in regions with higher coherence between spatial maps and  
233 with strong bimodal representation (Fig. 2K-L).

234         Functional maps measured with wide-field calcium imaging could result from  
235 direct inputs from visual and tactile cortical areas, could be evoked by top-down inputs  
236 (31) or even be the result of highly stereotypical uninstructed movements evoked by  
237 sensory stimuli (32). To investigate the synaptic origin of these responses, we  
238 performed additional experiments to anatomically map axonal projections from  
239 primary sensory areas to associative areas displaying visuo-tactile representations.  
240 We obtained visual and tactile functional maps for vertical spatial representation in  
241 wild-type mice using intrinsic optical signal imaging under low isoflurane anesthesia  
242 (see Methods). These maps were then used to identify two cortical locations  
243 representing distinct iso-horizontal vertical positions in V1 or to target B2 and C2  
244 barrels in S1. We re-opened the cranial window and injected two adeno-associated  
245 viral vectors to induce expression of GFP and tdTomato in the respective locations  
246 (Supplementary Fig. S5). After 10-15 days, transcardial perfusion was performed and  
247 brains were extracted, flattened and sliced (see Methods). We used  
248 immunohistochemical localization of M2 muscarinic acetylcholine receptors  
249 (M2AChR) to identify the barrels in S1 and V1, given the enriched presence of these  
250 receptors in these regions. We could then use these landmarks to fit the Allen Mouse  
251 Brain Atlas on the reconstructed stack confirming the locations of injection sites along  
252 the vertical representation of V1 and S1 (Fig. 2M-N). Axonal projections from the  
253 primary sensory areas were found in associative cortical regions where visuo-tactile  
254 responses were measured with the same spatial organization. This confirms that the  
255 functional maps depicted in Figure 2F-G are, in part, inherited from direct feed-forward  
256 projections from primary cortical areas.

257           Since cross-modal transfer learning could stem from sensory information  
258           transitioning between systems, we hypothesized that spatially organized feedback  
259           projections would be essential to generate responses like those observed in Figure  
260           2F-G. In particular, no direct projections were found from V1 to S1 while visual stimuli  
261           could evoke responses in S1. Previous work has shown that feedback from high visual  
262           areas (including A, RL, AL and LI) to V1 are spatially organized along the vertical  
263           dimension (33) but it is not clear if this holds true for feedback projections to S1.  
264           Feedback projections from associative areas to S1 were assessed with the same  
265           strategy for anatomical mapping, using injections of Cholera Toxin Subunit B (CTB)  
266           conjugated either with Alexa555 or Alexa 647 (Fig. 2O). We observed retinotopically  
267           organized feedback projections from associative areas to S1 (see Methods).

268           These findings suggest that sensory representations elicited by either visual or  
269           whisker tactile stimuli have a consistent organization throughout much of the dorsal  
270           cortex. These representations are directly inherited from axonal projections originating  
271           from primary sensory areas. Furthermore, spatially organized feedforward and  
272           feedback projections allow spatial information to be transferred from one sensory  
273           modality to another. However, functional maps obtained with wide-field imaging do not  
274           reveal precise computation performed at single-cell level and could still be prone to  
275           artefacts produced by neuronal processes originating from other brain structures. We  
276           performed two-photon calcium imaging in a subset of mice implanted with a cranial  
277           window. Single neurons GCaMP6f signal was extracted during the visuo-tactile sparse  
278           noise protocol in fields of view covering different cortical areas identified with the atlas  
279           (Supplementary Fig. S6A-F). Properties for single neurons could then be realigned on  
280           the reference atlas across mice to compare local cellular responses extracted at the  
281           soma with the corresponding wide-field region. Many recordings were performed

282 across a large portion of the dorsal cortex to fully cover the responsive visuo-tactile  
283 areas (Supplementary Fig. S6G-H). In doing this, we reconstructed somatotopic maps  
284 for the vertical axis across the cranial window that aligned closely with the wide-field  
285 maps (Fig. 3A). Neurons with whisker tactile responses were found across the belt of  
286 associative areas following the somatotopic organization. This further confirms a more  
287 extended network of whisker responsive and visuo-tactile cortical regions (30). The  
288 same was true for neurons responding to visual stimuli which were found across most  
289 visual and tactile areas even extending to S1 and S2 (Fig. 3B). Importantly, we  
290 localized neurons that were bimodal in that they responded to unisensory visual or  
291 whisker stimuli revealing two distinct clusters of neurons (Fig. 3C) corresponding to  
292 the domains identified with wide-field imaging (Fig. 2H). As the centers of these  
293 clusters were located in areas associated with the dorsal (A, RL) and ventral (AL, LI,  
294 LM) streams, we will use these designations moving forward.

295 We then characterized the response properties of single neurons for visuo-  
296 tactile stimuli in comparison to their responses to unisensory stimulations (Fig. 3D)  
297 using delayed tactile stimuli as previously described (Supplementary Fig. S4E-H). We  
298 found that multimodal neurons are generally tuned to both a vertical visual position  
299 and to one whisker. For example, the neuron in Figure 3D responded to the bottom  
300 part of the visual field and to the bottom whisker therefore showing selectivity for  
301 spatially congruent visual and tactile inputs. Using these unisensory responses, we  
302 predicted the response pattern to visuo-tactile stimuli as the maximum response  
303 between the two modalities for each combination. When comparing the predicted with  
304 the measured responses, we observed suppression in incongruent combinations  
305 whereas congruent combinations were either unaffected or slightly enhanced. Hence,  
306 neurons conserved a specific selectivity for bottom stimuli regardless of the modalities

307 stimulated (unisensory or multisensory) reminiscent of supramodal encoding of object  
308 orientation in visuo-tactile neurons of the rat posterior parietal cortex (18). Responses  
309 selective for spatially congruent whisker and visual stimuli in single neurons were  
310 confirmed at the population level across all multimodal neurons (Fig. 3E). Additionally,  
311 we observed that neurons maintained a larger tuning for whisker and visual position  
312 in measured responses compared to predicted ones (Fig. 3F). Neurons in the ventral  
313 areas were more tuned to specific visual locations while neurons in the dorsal areas  
314 were more tuned to specific whiskers (Fig. 3G-H), in line with the modality preference  
315 observed with wide-field imaging (Fig. 2H). These results showed that neurons in  
316 visuo-tactile associative areas are indeed specifically responding to spatially  
317 congruent visuo-tactile stimuli and maintain a spatial preference independent from the  
318 sensory input despite specialized modality preferences in the ventral and dorsal areas.

319       Functional properties observed both at large scale and at single-cell level as  
320 well as the anatomical connectivity between visual and whisker somatosensory  
321 cortices indicate that they could mediate cross-modal transfer learning during goal-  
322 directed behaviors. To test this hypothesis, we performed loss-of-function  
323 manipulations. As these representations are present in naive mice (not yet exposed  
324 to any behavioral task), the propagation of evoked responses from the primary sensory  
325 cortex to other cortices during training could begin to recruit neurons supporting task  
326 execution early in the training process. Therefore, we reasoned that visuo-tactile  
327 associative cortical areas should be silenced prior to any learning as cross-modal  
328 transfer could happen already during learning. To do so, we expressed the tetanus  
329 toxin light chain (TeNT-P2A-GFP) through viral vectors delivery to prevent the release  
330 of synaptic neurotransmitters in transfected neurons (see Methods). Neurons  
331 expressing TeNT also co-expressed GFP, allowing comparison of the expression

332 pattern with the previously obtained atlas (Fig. 4A). After removing blood vessels  
333 patterns and comparing with expression before injection (see Methods), we  
334 characterized the extent of GFP expression and overlap with different visuo-tactile  
335 areas (Fig. 4B). To ensure that vesicle release in the transfected neurons was  
336 significantly suppressed before beginning the behavioral training, we waited at least  
337 four weeks after the viral injection (34). Mice were able to normally learn the whisker  
338 discrimination task as shown by the expert performance of an example mouse in  
339 Figure 4C. However, upon switching to the visual task with congruent reward  
340 contingencies, performance dropped to chance level. The mouse responded to visual  
341 stimuli at the same frequency as its spontaneous reactions, suggesting an inability to  
342 detect or discriminate (Fig. 4D).

343         To assess which visuo-tactile area was necessary for the cross-modal transfer  
344 learning, we expressed TeNT-P2A-GFP in each mouse using a different location (see  
345 Methods). Across all mice, we managed to cover all visuo-tactile areas with different  
346 degrees of overlap for each mouse (Supplementary Fig. S7). For every mouse, we  
347 then performed the modality switch and measured changes in performance following  
348 the switch. Collecting data from all the mice, we could then compute, for each cortical  
349 area, how much overlap of GFP expression with this area correlates with the  
350 performance drop (Supplementary Fig. S7F). This analysis revealed that only RL  
351 silencing results in strong significant correlation with behavior impairment (Fig. 4E).  
352 To confirm this result, we also performed a reverse-correlation analysis mapping the  
353 average GFP coverage that evoked a complete impairment of transfer learning  
354 (average performance below 55% post-switch) also highlighting RL as being  
355 necessary for cross-modal transfer learning (Fig. 4F). The boundary of S1 was also

356 discernible, potentially due to a consistent spread of fluorescence resulting from the  
357 dense axonal projections from RL to S1 (Fig. 2O).

358         When targeting injections specifically to areas within the dorsal or ventral  
359 streams, we found that silencing the dorsal stream notably hindered transfer learning,  
360 leading to slower re-learning post-congruent switch (Fig. 4G-H). In contrast, silencing  
361 the ventral stream did not prevent mice from performing above chance level, despite  
362 an initial performance drop that was rapidly recovered (Fig. 4I-J). Mice with silenced  
363 RL could learn the whisker task normally but were not able to transfer learned  
364 associations to the visual task using spatial correspondence. However, they were able  
365 to learn the visual task in the following days indicating that their ability to learn both  
366 tasks was not impaired, only the transfer was. We therefore observed a dramatic  
367 difference in performance change after the switch with control mice described in Figure  
368 1I compared to all mice expressing TeNT for the same protocol (Fig. 4K). To  
369 characterize the learning trajectory of mice expressing TeNT in visuo-tactile areas, we  
370 isolated all mice with complete transfer impairment and measured the learning rate  
371 following the switch. Interestingly, mice with impaired transfer learning could still learn  
372 the visual task with learning rate comparable to the one observed for the auditory to  
373 visual transfer (Fig. 4L) indicating that TeNT mice learn the visual task with the same  
374 rate as a task without spatial information.

375

## 376 **Discussion**

377         In this study, we investigated the behavioral and neurophysiological  
378 underpinning of cross-modal transfer learning in mice, focusing on the representation  
379 of space across modalities. We first described a novel behavioral phenomenon where



380 mice display an ability for cross-modal transfer learning across whisker and visual  
381 modalities using spatial information. We then examined spatial representations in the  
382 dorsal cortex of mice during unisensory and multisensory stimulations. Using a visuo-  
383 tactile sparse noise protocol, we obtained retinotopic and somatotopic maps for  
384 elevation, discovering organized somatotopic maps in various associative areas  
385 traditionally known as visual areas only. Notably, similar spatial organizations along  
386 the vertical axis were observed for both visual and whisker tactile stimuli, suggesting  
387 shared representations across modalities. We mapped anatomical axonal projections  
388 between primary sensory areas and associative areas, unveiling a network of both  
389 feedforward and feedback projections that allows permanent spatial information  
390 transfer between sensory modalities. Single-cell recordings corroborated these  
391 findings, with neurons showing a preference for spatially congruent visuo-tactile stimuli,  
392 together with a spatial profile of multisensory modulation enabling supramodal  
393 encoding of space. Lastly, we demonstrated that silencing the visuo-tactile cortical  
394 area RL prior to training disrupted mice's ability to generalize from a whisker-based  
395 task to a congruent visual-based task, highlighting the central role of this area in cross-  
396 modal transfer learning. These results thus reveal the existence of interconnected  
397 spatial representations in the dorsal cortex and their role in multisensory processing  
398 and learning.

399         Contrary to the longstanding belief that cross-modal transfer learning is  
400 exclusive to apes and humans (35), studies have unveiled this cognitive ability in  
401 various species, including rodents (2) and, more recently, bumblebees (36). Early  
402 research into the brain circuits involved in cross-modal processing underscores the  
403 necessity of different brain structures to transfer diverse types of information such as  
404 spatial, temporal, and object-related features (4, 7, 8). These findings advocate for the

405 existence of dedicated cortical circuits developed for specific multimodal  
406 representations and functions. The posterior parietal cortex (PPC) plays an important  
407 role in processing spatial information (24, 25). Our results point out that area RL, a  
408 subregion of PPC, is crucial for cross-modal transfer learning based on spatial  
409 properties. Nonetheless, other forms of cross-modal transfer learning, like object  
410 recognition or duration discrimination, may engage different cortical regions.

411         Wide-field imaging and anatomical mapping experiments revealed a more  
412 extensive network of visuo-tactile associative cortical areas than previously identified  
413 (22, 23, 37). Many associative areas exhibited a shared representation of vertical  
414 space between visual and whisker tactile inputs. Previous research reported aligned  
415 representations of whisker and visual sensory inputs in the superior colliculus, where  
416 each whisker's representation was proportional to the space it occupies on the visual  
417 field, favoring whiskers of the top rows (20, 21). Past work had also hinted at the  
418 existence of similar co-aligned maps in cortical area RL, albeit with different  
419 coordinates and lacking spatial resolution (22). The spatial maps we observed  
420 extended even to primary sensory cortices through associative areas, with strong  
421 responses observed in S1 following pure visual stimuli, despite no direct projections  
422 between V1 and S1 (38). This second-order response map could potentially  
423 correspond to area lateral to RL (RLL), previously reported as overlapping with S1  
424 (28). Although recent findings advise caution in interpreting cross-modal signals  
425 between primary cortical areas due to potential confusion with signals evoked by  
426 uninstructed movements (32), our results suggest that certain fundamental features,  
427 such as spatial location, indeed have a shared multimodal representation across  
428 various cortical areas, possibly oriented toward object or event-oriented encoding (39).  
429 More complex features like orientation have been identified as being represented in

430 parts of the posterior parietal cortex (PPC) with supramodal encoding for visuo-tactile  
431 stimuli (40). Future work could explore whether these representations in PPC are  
432 essential for the cross-modal transfer learning of these features.

433         Indeed, the dorsal stream areas are traditionally associated with spatial,  
434 attentional, or movement processing, while ventral stream areas are linked to object  
435 recognition. Previous studies have reported visuo-tactile multimodal responses in both  
436 ventral and dorsal pathways in primates (41–43), including areas initially thought to be  
437 exclusive to visual processing like V4 (44) and MT/V5 (45). Our study uncovers an  
438 extended network of visuo-tactile areas, some belonging to the ventral or dorsal  
439 streams in mice (37, 46). Specifically, RL and A are typically allocated to the dorsal  
440 stream, while LI, with its significant projection to the postrhinal (POR) cortex, is  
441 associated with the ventral stream (37). Lesions in the perirhinal cortex in rats,  
442 downstream to POR, yield a severe impairment in learning to discriminate complex  
443 tactile features (47) and obstruct cross-modal object recognition during spontaneous  
444 exploration (8). This finding implies that the ventral pathway might contribute more to  
445 cross-modal object recognition rather than the cross-modal spatial mapping observed  
446 in RL (48, 49). Future research focusing on object discrimination could provide further  
447 insight into this hypothesis.

448         Area RL is strategically positioned between the primary visual cortex and the  
449 primary whisker somatosensory cortex, facilitating bidirectional information transfer  
450 between these sensory systems. It possesses a retinotopic map biased towards the  
451 lower part of the visual field (28) where most whiskers are visible, and its neurons are  
452 tuned to high binocular disparity, aligning with objects in close proximity, potentially  
453 within whiskers' reach (50). Our anatomical findings highlight that RL possesses  
454 robust feedback projections to S1. Feedback projections from higher-order visual

455 areas to the primary visual cortex in mice have been shown to influence V1 responses  
456 (51) and to shape the properties of the non-classical receptive field with contextual  
457 information (52). These feedback projections are retinotopically organized (33) and  
458 modulate responses through dendritic integration in a location-specific way (53).  
459 Consequently, feedback projections from RL could potentially perform two distinct  
460 functions: contextual integration within the visual modality and cross-modal  
461 information transfer.

462         At the single-neuron level, we observed multisensory modulations that favor  
463 spatially congruent visuo-tactile stimuli and suppresses responses to incongruent  
464 stimuli. This response pattern could potentially arise from surround suppression for  
465 incongruent inputs, mediated by local parvalbumin-positive interneurons as observed  
466 for conflicting visuo-auditory stimuli (13). Our protocol enables the comparison of  
467 congruent versus incongruent combinations, uncovering multisensory modulation  
468 rules that shape a supramodal representation of spatial inputs. Similar coding  
469 schemes have been reported for the orientation of visual or tactile gratings (40). This  
470 raises the question of spatio-temporal properties of visuo-tactile stimuli that are  
471 perceived as congruent. The evoked responses in the somatosensory cortex precede  
472 visual responses by around 150 ms, and multisensory modulation is enhanced when  
473 the onset of evoked activity aligns (22, 23). Given that objects are typically seen before  
474 being touched, we hypothesize that this could signify a delay in sensory information  
475 under natural conditions. A systematic characterization of the spatio-temporal  
476 properties of visuo-tactile stimuli perceived as congruent could help elucidate the  
477 cortical circuits that bind multisensory properties in experienced objects and events.

478

479 **References and Notes:**

- 480 1. U. Noppeney, Perceptual Inference, Learning, and Attention in a Multisensory  
481 World. *Annu Rev Neurosci.* **44**, 449–473 (2021).
- 482 2. J. M. Cloke, D. L. Jacklin, B. D. Winters, The neural bases of crossmodal object  
483 recognition in non-human primates and rodents: A review. *Behavioural Brain*  
484 *Research.* **285**, 118–130 (2015).
- 485 3. W. H. Meck, R. M. Church, Discrimination of intertrial intervals in cross-modal  
486 transfer of duration. *Bull Psychon Soc.* **19**, 234–236 (1982).
- 487 4. E. H. Yeterian, The effects of visual or auditory cortical lesions on specific cross-  
488 modal transfer in the rat. *Neuropsychologia.* **15**, 517–527 (1977).
- 489 5. R. Over, N. J. Mackintosh, Cross-modal Transfer of Intensity Discrimination by  
490 Rats. *Nature.* **224**, 918–919 (1969).
- 491 6. E. R. Delay, Effects of cross-modal transfer on direct and reversal learning in the  
492 rat. *Anim Learn Behav.* **14**, 427–434 (1986).
- 493 7. R. Tees, The effects of posterior parietal and posterior temporal cortical lesions  
494 on multimodal spatial and nonspatial competencies in rats. *Behavioural Brain*  
495 *Research.* **106**, 55–73 (1999).
- 496 8. B. D. Winters, J. M. Reid, A Distributed Cortical Representation Underlies  
497 Crossmodal Object Recognition in Rats. *The Journal of Neuroscience.* **30**, 6253–  
498 6261 (2010).

- 499 9. M. A. Meredith, B. E. Stein, Visual, auditory, and somatosensory convergence on  
500 cells in superior colliculus results in multisensory integration. *J Neurophysiol.* **56**,  
501 640–662 (1986).
- 502 10. M. T. Wallace, M. A. Meredith, B. E. Stein, Multisensory Integration in the Superior  
503 Colliculus of the Alert Cat. *J Neurophysiol.* **80**, 1006–1010 (1998).
- 504 11. E. Macaluso, Multisensory Processing in Sensory-Specific Cortical Areas. *The*  
505 *Neuroscientist.* **12**, 327–338 (2006).
- 506 12. G. A. Calvert, T. Thesen, Multisensory integration: methodological approaches and  
507 emerging principles in the human brain. *Journal of Physiology-Paris.* **98**, 191–205  
508 (2004).
- 509 13. Y. H. Song, J. H. Kim, H. W. Jeong, I. Choi, D. Jeong, K. Kim, S. H. Lee, A Neural Circuit  
510 for Auditory Dominance over Visual Perception. *Neuron.* **93**, 940-954.e6 (2017).
- 511 14. A. R. Garner, G. B. Keller, A cortical circuit for audio-visual predictions. *Nat*  
512 *Neurosci.* **25**, 98–105 (2022).
- 513 15. L. Godenzini, D. Alwis, R. Guzulaitis, S. Honnuraiah, G. J. Stuart, L. M. Palmer,  
514 Auditory input enhances somatosensory encoding and tactile goal-directed  
515 behavior. *Nat Commun.* **12** (2021), doi:10.1038/s41467-021-24754-w.
- 516 16. E. W. Jenkinson, M. Glickstein, Whiskers, barrels, and cortical efferent pathways in  
517 gap crossing by rats. *J Neurophysiol.* **84**, 1781–1789 (2000).
- 518 17. N. J. Sofroniew, J. D. Cohen, A. K. Lee, K. Svoboda, Natural whisker-guided  
519 behavior by head-fixed mice in tactile virtual reality. *Journal of Neuroscience.* **34**,  
520 9537–9550 (2014).

- 521 18. N. Nikbakht, A. Tafreshiha, D. Zoccolan, M. E. Diamond, Supralinear and  
522 Supramodal Integration of Visual and Tactile Signals in Rats: Psychophysics and  
523 Neuronal Mechanisms. *Neuron*. **97**, 626-639.e8 (2018).
- 524 19. S. Gharaei, E. Arabzadeh, S. G. Solomon, Integration of visual and whisker signals  
525 in rat superior colliculus. *Sci Rep*. **8** (2018), doi:10.1038/s41598-018-34661-8.
- 526 20. U. C. Drager, D. H. Hubel, Physiology of visual cells in mouse superior colliculus  
527 and correlation with somatosensory and auditory input. *Nature*. **253**, 203–204  
528 (1975).
- 529 21. U. C. Drager, D. H. Hubel, Topography of visual and somatosensory projections to  
530 mouse superior colliculus. *J Neurophysiol*. **39**, 91–101 (1976).
- 531 22. U. Olcese, G. Iurilli, P. Medini, Cellular and synaptic architecture of multisensory  
532 integration in the mouse neocortex. *Neuron*. **79**, 579–593 (2013).
- 533 23. J. Caron-Guyon, J. Corbo, Y. Zennou-Azogui, C. Xerri, A. Kavounoudias, N. Catz,  
534 Neuronal encoding of multisensory motion features in the rat associative parietal  
535 cortex. *Cerebral Cortex*. **30**, 5372–5386 (2020).
- 536 24. J. R. Whitlock, Posterior parietal cortex. *Current Biology*. **27**, R691–R695 (2017).
- 537 25. S. Pasalar, T. Ro, M. S. Beauchamp, TMS of posterior parietal cortex disrupts visual  
538 tactile multisensory integration. *European Journal of Neuroscience*. **31**, 1783–  
539 1790 (2010).
- 540 26. R. Chéreau, T. Bawa, L. Fodouliau, A. Carleton, S. Pagès, A. Holtmaat, Dynamic  
541 perceptual feature selectivity in primary somatosensory cortex upon reversal  
542 learning. *Nat Commun*. **11**, 3245 (2020).

- 543 27. A. Banerjee, G. Parente, J. Teutsch, C. Lewis, F. F. Voigt, F. Helmchen, Value-guided  
544 remapping of sensory cortex by lateral orbitofrontal cortex. *Nature*. **585**, 245–  
545 250 (2020).
- 546 28. J. Zhuang, L. Ng, D. Williams, M. Valley, Y. Li, M. Garrett, J. Waters, An extended  
547 retinotopic map of mouse cortex. *Elife*. **6**, 1–29 (2017).
- 548 29. G. Matteucci, M. Guyoton, J. M. Mayrhofer, M. Auffret, G. Foustoukos, C. C. H.  
549 Petersen, S. El-Boustani, Cortical sensory processing across motivational states  
550 during goal-directed behavior. *Neuron*. **110**, 4176-4193.e10 (2022).
- 551 30. T. Yamashita, A. Vavladeli, A. Pala, K. Galan, S. Crochet, S. S. A. Petersen, C. C. H.  
552 Petersen, Diverse Long-Range Axonal Projections of Excitatory Layer 2/3  
553 Neurons in Mouse Barrel Cortex. *Front Neuroanat*. **12** (2018),  
554 doi:10.3389/fnana.2018.00033.
- 555 31. I. Choi, J.-Y. Lee, S.-H. Lee, Bottom-up and top-down modulation of multisensory  
556 integration. *Curr Opin Neurobiol*. **52**, 115–122 (2018).
- 557 32. C. Bimbard, T. P. H. Sit, A. Lebedeva, C. B. Reddy, K. D. Harris, M. Carandini,  
558 Behavioral origin of sound-evoked activity in mouse visual cortex. *Nat Neurosci*.  
559 **26**, 251–258 (2023).
- 560 33. M. M. Morimoto, E. Uchishiba, A. B. Saleem, Organization of feedback projections  
561 to mouse primary visual cortex. *iScience*. **24** (2021),  
562 doi:10.1016/j.isci.2021.102450.
- 563 34. B. Zingg, B. Peng, J. Huang, H. W. Tao, L. I. Zhang, Synaptic Specificity and  
564 Application of Anterograde Transsynaptic AAV for Probing Neural Circuitry. *The*  
565 *Journal of Neuroscience*. **40**, 3250–3267 (2020).



- 566 35. R. K. Davenport, C. M. Rogers, Intermodal Equivalence of Stimuli in Apes. *Science*  
567 (1979). **168**, 279–280 (1970).
- 568 36. C. Solvi, S. Gutierrez Al-Khudhairy, L. Chittka, Bumble bees display cross-modal  
569 object recognition between visual and tactile senses. *Science (1979)*. **367**, 910–  
570 912 (2020).
- 571 37. Q. Wang, O. Sporns, A. Burkhalter, Network analysis of corticocortical connections  
572 reveals ventral and dorsal processing streams in mouse visual cortex. *Journal of*  
573 *Neuroscience*. **32**, 4386–4399 (2012).
- 574 38. Q. Wang, A. Burkhalter, Area map of mouse visual cortex. *Journal of Comparative*  
575 *Neurology*. **502**, 339–357 (2007).
- 576 39. A. A. Ghazanfar, C. E. Schroeder, Is neocortex essentially multisensory? *Trends*  
577 *Cogn Sci*. **10** (2006), pp. 278–285.
- 578 40. N. Nikbakht, A. Tafreshiha, D. Zoccolan, M. E. Diamond, Supralinear and  
579 Supramodal Integration of Visual and Tactile Signals in Rats: Psychophysics and  
580 Neuronal Mechanisms. *Neuron*. **97**, 626-639.e8 (2018).
- 581 41. A. Amedi, R. Malach, T. Hendler, S. Peled, E. Zohary, Visuo-haptic object-related  
582 activation in the ventral visual pathway. *Nat Neurosci*. **4**, 324–330 (2001).
- 583 42. T. W. James, S. Kim, "Dorsal and Ventral Cortical Pathways for Visuo-haptic Shape  
584 Integration Revealed Using fMRI" in *Multisensory Object Perception in the Primate*  
585 *Brain* (Springer New York, New York, NY, 2010), pp. 231–250.
- 586 43. S. Lacey, K. Sathian, Visuo-haptic multisensory object recognition, categorization,  
587 and representation. *Front Psychol*. **5** (2014), doi:10.3389/fpsyg.2014.00730.

- 588 44. J. H. R. Maunsell, G. Sclar, T. A. Nealey, D. D. DePriest, Extraretinal representations  
589 in area V4 in the macaque monkey. *Vis Neurosci.* **7**, 561–573 (1991).
- 590 45. M. C. Hagen, O. Franzén, F. McGlone, G. Essick, C. Dancer, J. V. Pardo, Tactile  
591 motion activates the human middle temporal/V5 (MT/V5) complex. *European*  
592 *Journal of Neuroscience.* **16**, 957–964 (2002).
- 593 46. J. H. Marshel, M. E. Garrett, I. Nauhaus, E. M. Callaway, Functional specialization of  
594 seven mouse visual cortical areas. *Neuron.* **72**, 1040–1054 (2011).
- 595 47. J. M. J. Ramos, Essential Role of the Perirhinal Cortex in Complex Tactual  
596 Discrimination Tasks in Rats. *Cerebral Cortex.* **24**, 2068–2080 (2014).
- 597 48. G. Matteucci, R. Bellacosa Marotti, M. Riggi, F. B. Rosselli, D. Zoccolan, Nonlinear  
598 processing of shape information in rat lateral extrastriate cortex. *The Journal of*  
599 *Neuroscience*, 1938–18 (2019).
- 600 49. S. Tafazoli, H. Safaai, G. De Franceschi, F. B. Rosselli, W. Vanzella, M. Riggi, F.  
601 Buffolo, S. Panzeri, D. Zoccolan, Emergence of transformation-tolerant  
602 representations of visual objects in rat lateral extrastriate cortex. *Elife.* **6** (2017),  
603 doi:10.7554/eLife.22794.
- 604 50. A. La Chioma, T. Bonhoeffer, M. Hübener, Area-Specific Mapping of Binocular  
605 Disparity across Mouse Visual Cortex. *Current Biology.* **29**, 2954-2960.e5 (2019).
- 606 51. M. N. Oude Lohuis, A. C. Canton, C. M. A. Pennartz, U. Olcese, Higher order visual  
607 areas enhance stimulus responsiveness in mouse primary visual cortex. *Cerebral*  
608 *Cortex.* **32**, 3269–3288 (2022).

- 609 52. A. J. Keller, M. M. Roth, M. Scanziani, Feedback generates a second receptive field  
610 in neurons of the visual cortex. *Nature*. **582**, 545–549 (2020).
- 611 53. M. Fişek, D. Herrmann, A. Egea-Weiss, M. Cloves, L. Bauer, T. Y. Lee, L. E. Russell,  
612 M. Häusser, Cortico-cortical feedback engages active dendrites in visual cortex.  
613 *Nature*. **617**, 769–776 (2023).
- 614 54. K. K. Sit, M. J. Goard, Distributed and retinotopically asymmetric processing of  
615 coherent motion in mouse visual cortex. *Nat Commun*. **11**, 3565 (2020).
- 616 55. E. S. Lein, M. J. Hawrylycz, N. Ao, M. Ayres, A. Bensinger, A. Bernard, A. F. Boe, M. S.  
617 Boguski, K. S. Brockway, E. J. Byrnes, L. Chen, L. Chen, T.-M. Chen, M. Chi Chin, J.  
618 Chong, B. E. Crook, A. Czaplinska, C. N. Dang, S. Datta, N. R. Dee, A. L. Desaki, T.  
619 Desta, E. Diep, T. A. Dolbeare, M. J. Donelan, H.-W. Dong, J. G. Dougherty, B. J.  
620 Duncan, A. J. Ebbert, G. Eichele, L. K. Estin, C. Faber, B. A. Facer, R. Fields, S. R.  
621 Fischer, T. P. Fliss, C. Frensley, S. N. Gates, K. J. Glattfelder, K. R. Halverson, M. R.  
622 Hart, J. G. Hohmann, M. P. Howell, D. P. Jeung, R. A. Johnson, P. T. Karr, R. Kawal, J.  
623 M. Kidney, R. H. Knapik, C. L. Kuan, J. H. Lake, A. R. Laramée, K. D. Larsen, C. Lau, T.  
624 A. Lemon, A. J. Liang, Y. Liu, L. T. Luong, J. Michaels, J. J. Morgan, R. J. Morgan, M. T.  
625 Mortrud, N. F. Mosqueda, L. L. Ng, R. Ng, G. J. Orta, C. C. Overly, T. H. Pak, S. E.  
626 Parry, S. D. Pathak, O. C. Pearson, R. B. Puchalski, Z. L. Riley, H. R. Rockett, S. A.  
627 Rowland, J. J. Royall, M. J. Ruiz, N. R. Sarno, K. Schaffnit, N. V. Shapovalova, T.  
628 Sivisay, C. R. Slaughterbeck, S. C. Smith, K. A. Smith, B. I. Smith, A. J. Sodt, N. N.  
629 Stewart, K.-R. Stumpf, S. M. Sunkin, M. Sutram, A. Tam, C. D. Teemer, C. Thaller, C.  
630 L. Thompson, L. R. Varnam, A. Visel, R. M. Whitlock, P. E. Wohnoutka, C. K. Wolkey,  
631 V. Y. Wong, M. Wood, M. B. Yaylaoglu, R. C. Young, B. L. Youngstrom, X. Feng Yuan,

- 632 B. Zhang, T. A. Zwingman, A. R. Jones, Genome-wide atlas of gene expression in  
633 the adult mouse brain. *Nature*. **445**, 168–176 (2007).
- 634 56. M. Pachitariu, C. Stringer, S. Schröder, M. Dipoppa, L. F. Rossi, M. Carandini, K. D.  
635 Harris, Suite2p: beyond 10,000 neurons with standard two-photon microscopy.  
636 *bioRxiv*, 061507 (2016).
- 637
- 638

639 **Acknowledgements:**

640 We thank members of the El-Boustani laboratory for discussions.

641

642 **Funding:**

643 This work was supported by the Swiss National Science Foundation:

644 PCEFP3\_181070 (S.E.-B.).

645

646 **Author Contribution:**

647 M.G., G.M. and S.E.-B. conceived experiments. M.G. performed surgeries, viral  
648 infections, wide-field and two-photon imaging, behavioral experiments, and post-  
649 mortem analysis. G.M. and C.G.F. performed behavioral experiments. G.M. coded  
650 acquisition software and performed data analysis. M.G., G.M. and S.E.-B. wrote the  
651 manuscript.

652

653 **Competing interest:**

654 Authors declare no competing interests.

655

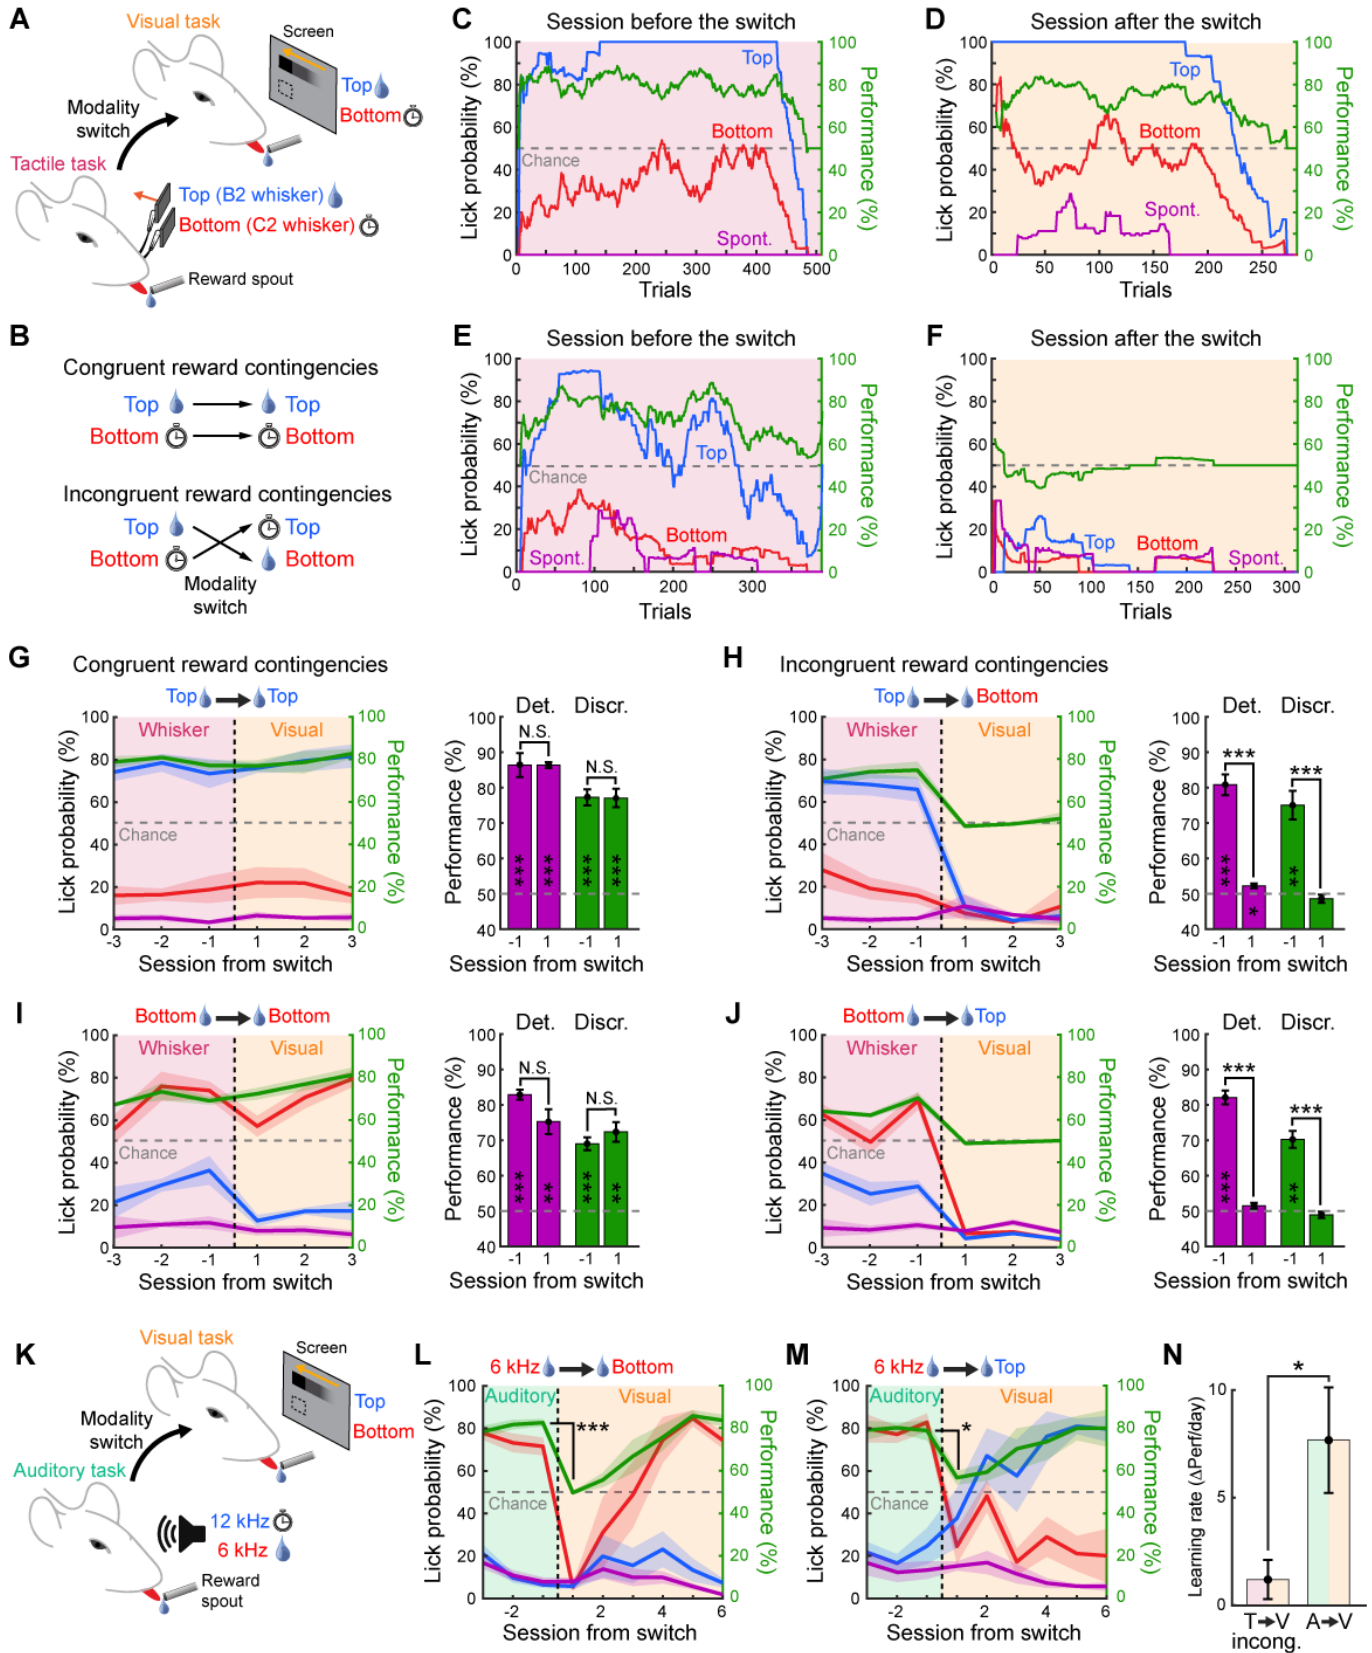

Figure 1

657 **Fig. 1. Cross-modal transfer learning in mice performing Go/No go**  
658 **discrimination tasks.**

659 **(A)** Schematic of behavioral paradigm for cross-modal transfer learning from a  
660 whisker-based tactile task to a visual task. Mice are trained to a Go/No go whisker  
661 discrimination task with two whiskers along a column (B2 and C2 whiskers). Once  
662 expert at the task, they are switched to a Go/No go visual discrimination task. **(B)** Two  
663 possible scenarios for modality switch: reward contingencies are either congruent  
664 between the two modalities (top stimuli remain associated to a reward after the switch  
665 and bottom stimuli remain associated to timeout punishment) or incongruent (bottom  
666 stimuli are associated to reward after the switch and top become associated to timeout  
667 punishment). **(C)** Example session taking place the last day before modality switch for  
668 a mouse expert at the whisker discrimination task where the top whisker is rewarded  
669 upon licking. Lick probabilities over trials are shown for the top whisker (blue), the  
670 bottom whisker (red) and in absence of stimuli (pink). Performance computed as the  
671 percentage of correct discrimination trials (see Methods) is shown in green.  
672 Performance chance level is indicated with a grey dashed line. Traces shown were  
673 computed using a sliding window of 60 trials. **(D)** Same as **C** for the first session after  
674 modality switch to a visual discrimination task with congruent reward contingencies.  
675 **(E-F)** Same as **C-D** but for a modality switch with incongruent reward contingencies  
676 between the tactile and visual task. **(G)** Average daily task performance and lick rates  
677 across days for mice population (N=5 mice) switching from the whisker task to the  
678 visual task with congruent reward contingencies where the top stimulus is rewarded.  
679 Shaded area: S.E.M. Black dashed line indicates the switch between modalities. Color  
680 code as in **C**. Histograms in the right indicate the detection (purple) and discrimination  
681 (green) performance distribution the day before and after the switch (two-sided paired

682 t-test comparing days, \* $p < 0.05$ , \*\* $p < 0.01$ , \*\*\* $p < 0.001$ , N.S. Not significant).  
683 Performances are also tested against chance level (two-sided t-test, \* $p < 0.05$ , \*\* $p < 0.01$ ,  
684 \*\*\* $p < 0.001$ , Blank: Not significant). **(H)** Same as **G** but for a modality switch with  
685 incongruent reward contingencies between the tactile and visual task where the top  
686 whisker was rewarded. **(I-J)** Same as **G-H** but for modality switches where bottom  
687 whisker was rewarded. **(K)** Schematic of behavioral paradigm where switch occurs  
688 between a Go/No go auditory discrimination task with two pure tones (6 kHz and 12  
689 kHz) and the visual task. The 6 kHz tone is always associated to a water reward. **(L)**  
690 Same as **G** with the bottom visual stimulus rewarded after switch from auditory task  
691 (N=5 mice, paired two-sided t-test comparing the day before and after switch,  
692 \*\*\* $p < 0.001$ ; discrimination performance after switch is compared to chance level with  
693 a two-sided t-test,  $p = 0.593$ ). **(M)** Same as **L** with the top visual stimulus rewarded after  
694 switch from auditory task (N=5 mice, paired two-sided t-test comparing the day before  
695 and after switch, \* $p < 0.05$ ; discrimination performance after switch is compared to  
696 chance level with two-sided t-test,  $p = 0.104$ ). **(N)** Comparison of learning rate between  
697 mice that underwent switch from a tactile to a visual task with incongruent reward  
698 contingencies and mice that underwent switch from an auditory task to a visual task  
699 (N=10 mice for tactile group and N=10 mice for auditory group, unpaired two-sided t-  
700 test, \* $p < 0.05$ ).

701

702

703



704

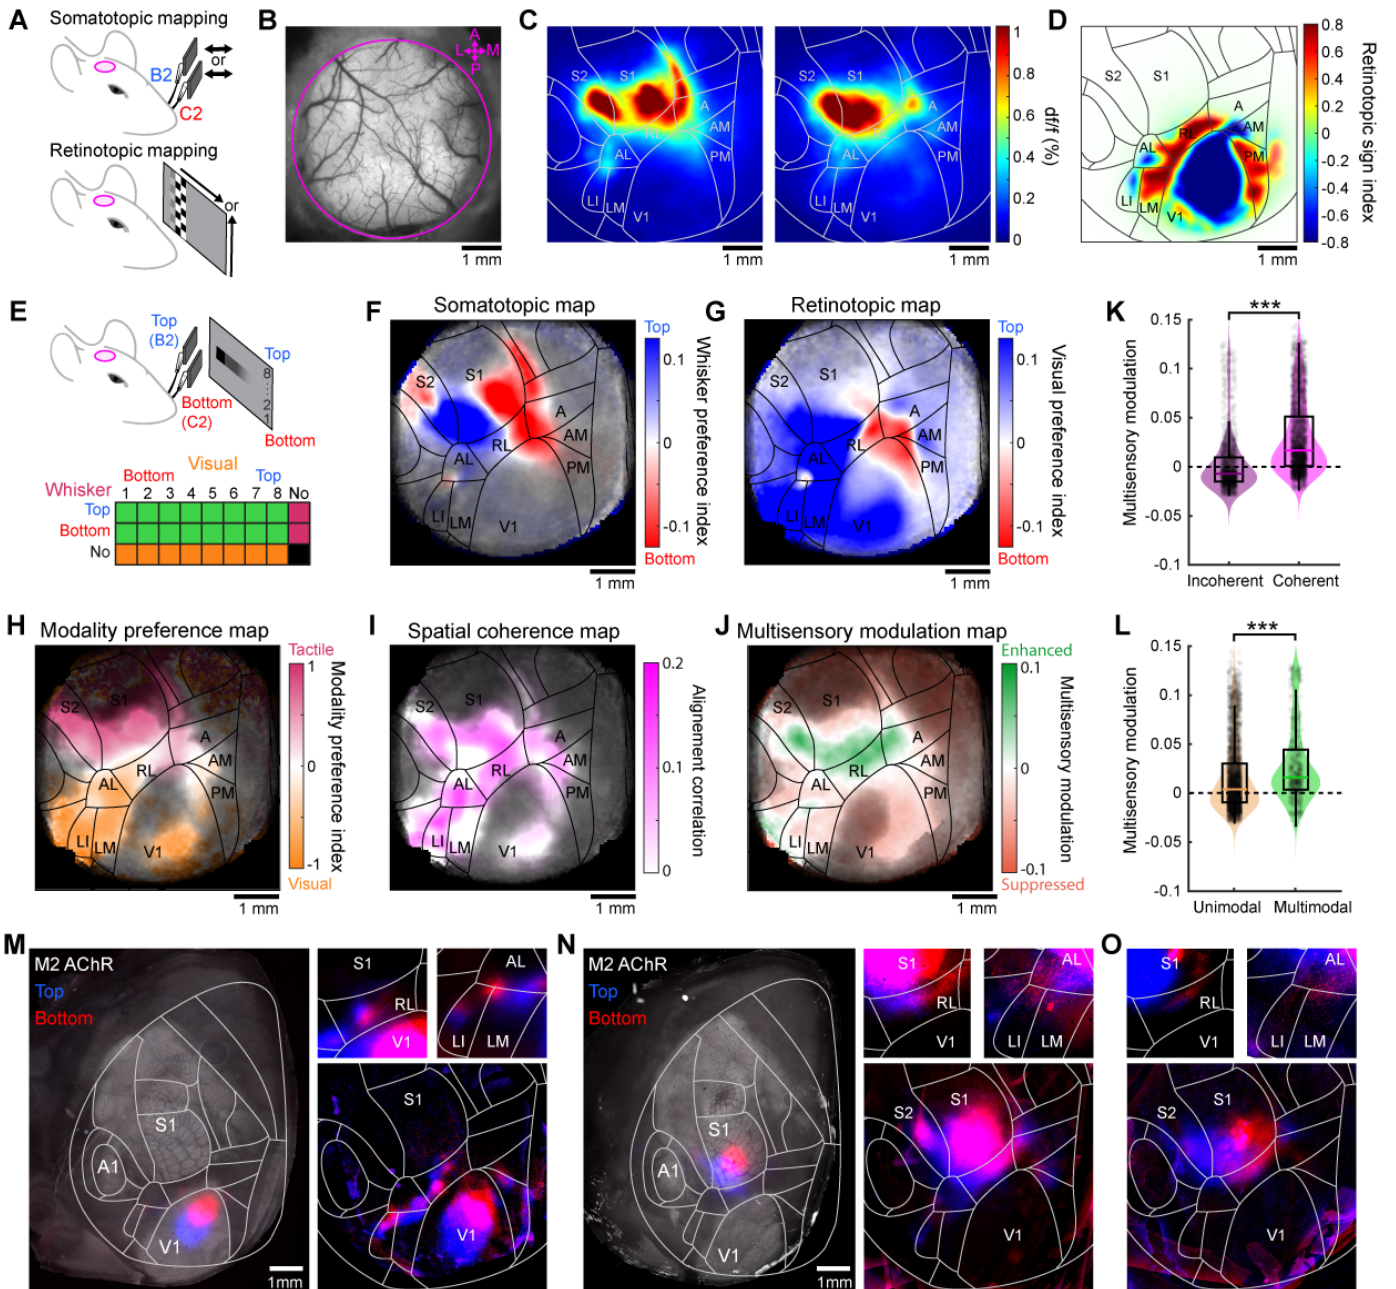

Figure 2

705 **Fig. 2. Functional and anatomical mapping of vertical space in retinotopically**  
706 **and somatotopically organized areas of the dorsal cortex.**

707 **(A)** Schematic of the protocols used to measure single whisker response maps (top)  
708 and retinotopic maps (bottom) in transgenic mice expressing GCaMP6f in layer 2/3  
709 imaged through a cranial window. **(B)** Example of a 5 mm diameter cranial window  
710 with blood vessels pattern. The perimeter of the window is highlighted in pink and  
711 orientation is indicated in top right. **(C)** Response maps averaged across mice (N=41  
712 mice) for C2 whisker (left) or B2 whisker (right) stimulations. Projection of the Allen  
713 Mouse Brain Atlas is overlaid on top with areas names. **(D)** Retinotopic sign maps  
714 averaged across N=50 mice and realigned to the atlas shown in **C**. **(E)** Schematic of  
715 the visuo-tactile sparse noise protocol. All possible combinations of visual and whisker  
716 stimuli are depicted in the matrix below. **(F)** Somatotopic maps for vertical space  
717 computed from whisker stimuli average across mice (N=29 mice), with transparency  
718 defined by response significance in each pixel (see Methods). **(G)** Retinotopic maps  
719 for vertical space computed from visual stimuli average across the same mice as in **F**,  
720 with transparency defined by response significance in each pixel (see Methods). **(H)**  
721 Modality preference maps between visual and tactile responses averaged across the  
722 same mice as in **F**. **(I)** Spatial coherence maps between visual and tactile  
723 representations (see Methods) averaged across the same mice as in **F**. **(J)**  
724 Multisensory maps comparing visuo-tactile responses and combination of unisensory  
725 responses (see Methods) averaged across the same mice as in **F**. **(K)** Multisensory  
726 modulation index for pixels belonging in regions of high spatial coherence compared  
727 to regions with lack of spatial coherence (n=2482 pixels versus n=1444 pixels,  
728 unpaired two-sided Wilcoxon test, \*\*\*p<10<sup>-15</sup>). **(L)** Multisensory modulation index for  
729 pixels belonging to unimodal or multimodal regions (n=3471 pixels versus n=600

730 pixels, unpaired two-sided t-test, \*\*\*  $p < 10^{-15}$ ). **(M)** Anterograde labeling of V1  
731 projections using pAAV-CAG-GFP and pAAV-CAG-tdTomato viral constructs injected  
732 in the top and bottom retinotopic part of V1, respectively. Left: injection sites in V1  
733 along the iso-horizontal axis. Right: conserved retinotopic organization of projections  
734 in associative areas for the mouse shown in the left (top) and averaged across mice  
735 (N=3 mice, bottom). **(N)** Same as **M** but for anterograde labeling of S1 projections with  
736 two injection sites in S1 in B2 and C2 barrels (N=6 mice). **(O)** Retrograde labeling of  
737 S1-projecting neurons using CTB-555 and CTB-647. Top: Example of CTB-labelled  
738 neurons spatially organized in associative areas. Bottom: Average CTB distribution  
739 across mice of associative neurons projecting to S1 (N=3 mice).

740

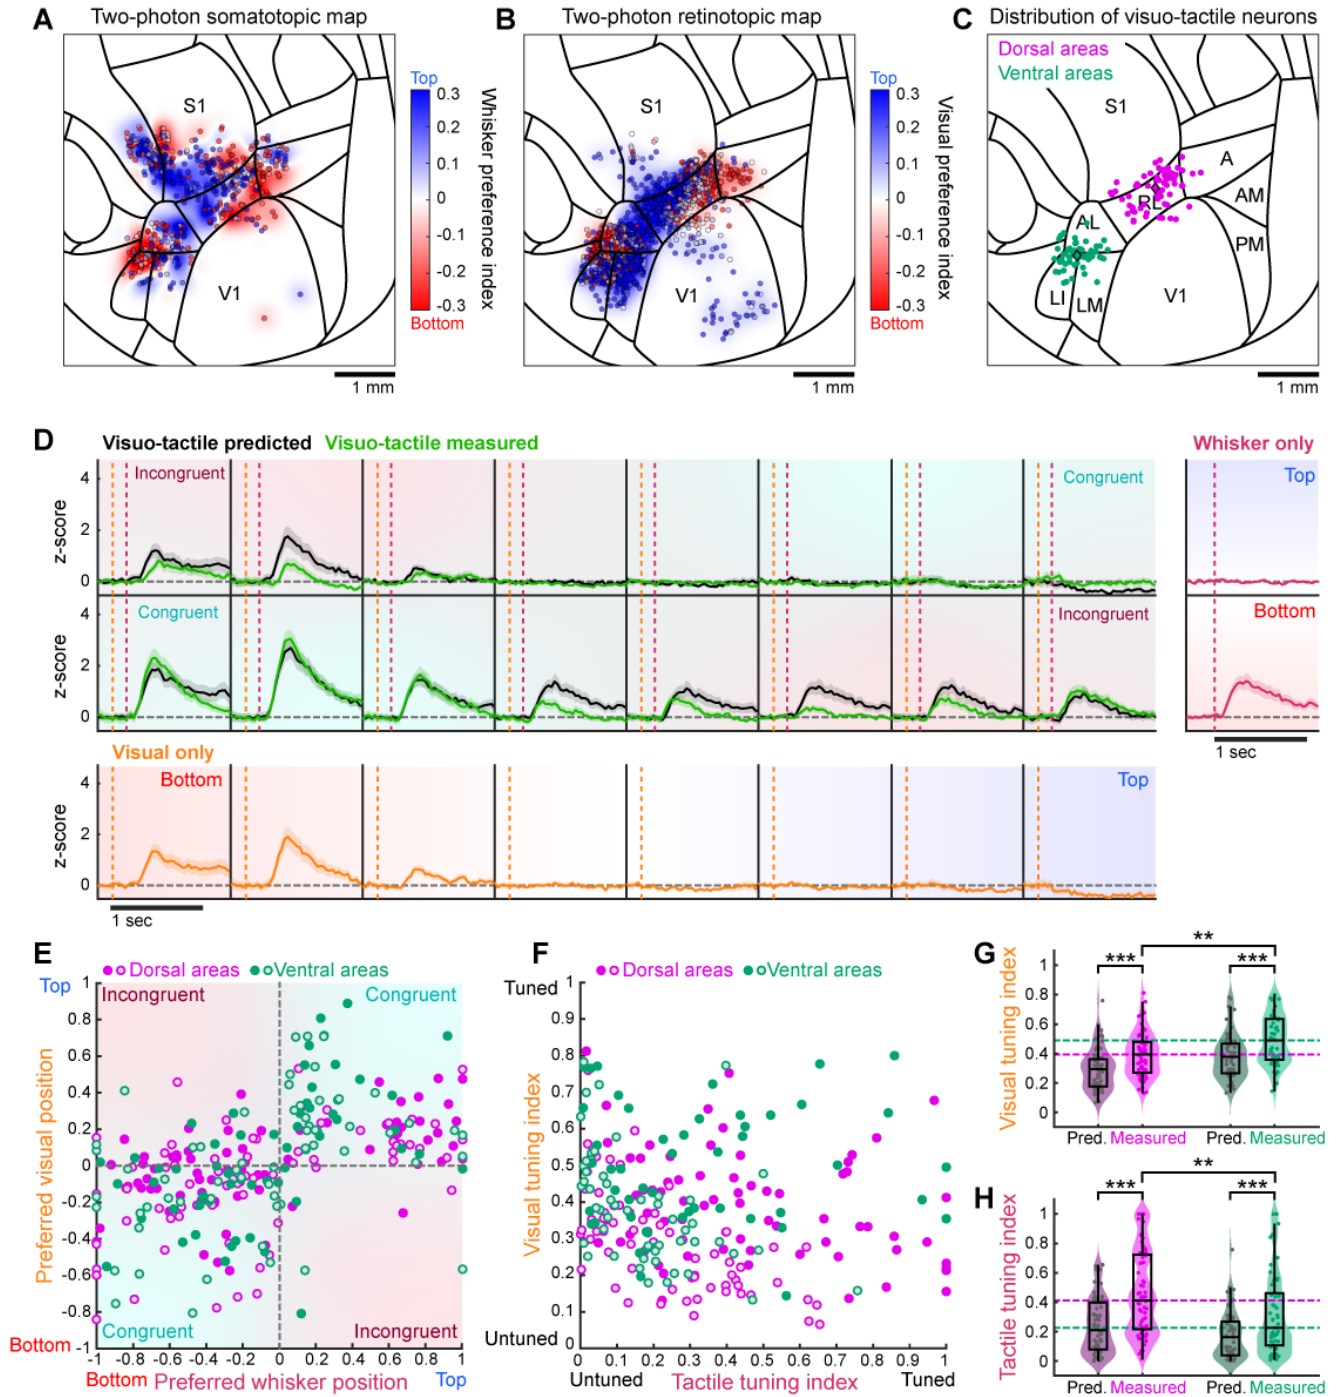

Figure 3

741 **Fig. 3. Visuo-tactile representations of vertical space in single neurons of the**  
742 **dorsal cortex.**

743 **(A)** Population of single neurons imaged with two-photon microscopy with GCaMP6f  
744 responses to whisker (n=623 neurons significantly responsive to tactile stimulation)  
745 stimuli. Each spot represents a single neuron and the color code indicate preference  
746 for the top (blue) or bottom (red) stimuli. Neurons are all realigned to a reference atlas.  
747 The reconstructed wide-field map is displayed in the background (see Methods,  
748 Pearson coefficient of correlation: 0.373,  $p < 10^{-16}$ ). **(B)** Same as **A** for neurons  
749 responding to visual stimuli (n=1595 neurons significantly responsive to visual  
750 stimulation, Pearson coefficient of correlation: 0.811,  $p < 10^{-16}$ ). **(C)** Distribution of all  
751 visuo-tactile multimodal neurons identified. Neurons are classified as part of the  
752 ventral (cyan) or dorsal (pink) pathway depending on their location (see Methods). **(D)**  
753 Response tuning properties of an example neuron from RL. Unisensory responses in  
754 z-score are shown on the side for visual (orange) or whisker (violet) stimuli. Based on  
755 these responses, predicted responses are shown for visuo-tactile stimuli (gray)  
756 together with measured responses (green). Error bars: S.E.M. **(E)** Comparison of  
757 preferred visual position and preferred whisker along the vertical space in visuo-tactile  
758 stimulation condition for predicted (open circles) and measured (full circles) responses  
759 of ventral neurons (n=59 significantly responsive multimodal neurons, Pearson  
760 coefficient: 0.39 for predicted with  $p < 2.589 \times 10^{-3}$  and 0.53 for measured with  
761  $p < 1.648 \times 10^{-5}$ ; 81% of neurons in congruent quadrants) and dorsal neurons (n=70  
762 significantly responsive multimodal neurons, Pearson coefficient: 0.44 for predicted  
763 with  $p < 1.395 \times 10^{-4}$  and 0.57 for measured with  $p < 2.509 \times 10^{-7}$ ; 74% of neurons in  
764 congruent quadrants). **(F)** Comparison between tactile and visual tuning indices  
765 computed from the predicted (open circles) or measured (full circles) visuo-tactile

766 responses of neurons in **E**. (**G**) Comparison of the visual tuning indices in visuo-tactile  
767 stimulation condition between predicted and measured responses for ventral and  
768 dorsal stream neurons (two-sided paired Wilcoxon test between measured and  
769 predicted for ventral:  $n=51$  neurons,  $***p=4.096*10^{-4}$ ; for dorsal:  $n=68$  neurons,  
770  $***p=2.777*10^{-6}$ ; two-sided unpaired t-test comparing dorsal and ventral measured  
771 responses:  $***p=1.121*10^{-3}$ ). (**G**) Same as **F** for the tactile tuning indices (two-sided  
772 paired Wilcoxon test between measured and predicted for ventral:  $n=51$  neurons,  
773  $***p=1.92*10^{-6}$ ; for dorsal:  $n=68$  neurons,  $***p=8.53*10^{-10}$ ; two-sided unpaired t-test  
774 comparing dorsal and ventral measured responses:  $***p=4.932*10^{-3}$ ).

775

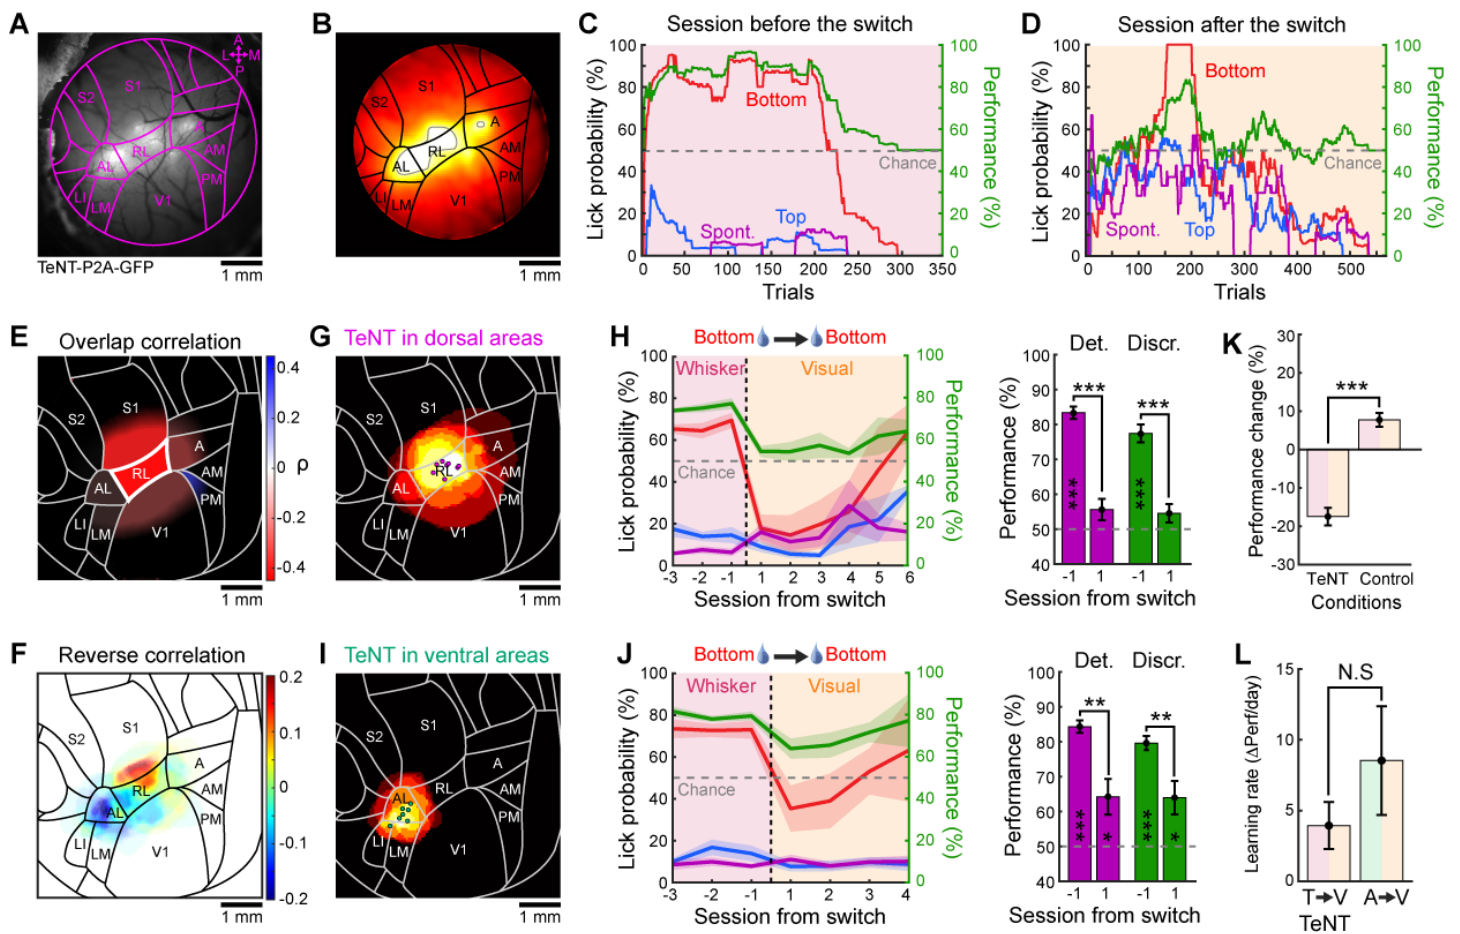

Figure 4

776 **Fig. 4. Loss-of-function of visuo-tactile cortical areas during transfer learning.**

777 (A) Image of a 5 mm diameter cranial window over the dorsal cortex with expression  
778 of TeNT-P2A-GFP in regions where viral vectors were injected. Atlas obtained through  
779 functional mapping is overlaid for reference. (B) Vessels-free normalized fluorescent  
780 expression pattern over the cranial window (see Methods). Gray contour indicates  
781 areas considered for correlation analysis. (C) Example session taking place the last  
782 day before modality switch for a mouse expert at the whisker discrimination task where  
783 the bottom whisker is rewarded upon licking. Lick probabilities over trials are shown  
784 for the top whisker (blue), the bottom whisker (red) and in absence of stimuli (pink).  
785 Performance computed as the percentage of correct discrimination trials (see  
786 Methods) is shown in green. Performance at chance level is indicated with a grey  
787 dashed line. Traces shown were computed using a sliding window of 60 trials. (D)  
788 Session following modality switch from a tactile task in C to a visual task. (E) Area-  
789 based correlation between GFP expression overlap and performance drop following  
790 modality switch. Color map indicates the Pearson coefficient  $\rho$  and areas with  $p < 0.05$   
791 are indicated with a thick border (RL with  $\rho = -0.43$  and S1 with  $\rho = -0.39$ ). (F) Average  
792 GFP coverage for mice with impaired transfer learning (average discrimination  
793 performance lower than 55%). The map is displayed after subtraction of the average  
794 coverage. (G) Average GFP coverage of all mice where only dorsal neurons were  
795 silenced (N=8 mice). (H) Average daily task performance and lick rates across days  
796 for mice population in G (N=8 mice) switching from the whisker task to the visual task  
797 with congruent reward contingencies where the bottom stimulus is rewarded. These  
798 mice are selected based on GFP expression overlap with dorsal visuo-tactile areas.  
799 Shaded area: S.E.M. Black dashed line indicates the switch between modalities. Color  
800 code as in C. Histograms in the right indicate the detection (purple) and discrimination  
801 (green) performance distribution the day before and after the switch (paired two-sided



802 t-test comparing days, \* $p < 0.05$ , \*\* $p < 0.01$ , \*\*\* $p < 0.001$ , N.S. Not significant).  
803 Performances are also tested against chance level (two-sided t-test, \* $p < 0.05$ , \*\* $p < 0.01$ ,  
804 \*\*\* $p < 0.001$ , Blank: Not significant). (I) Same as **G** but for GFP expression in the ventral  
805 stream (N=7 mice). (J) Same as **H** for ventral area (paired two-sided t-test comparing  
806 days, \* $p < 0.05$ , \*\* $p < 0.01$ , \*\*\* $p < 0.001$ , N.S. Not significant). Performances are also  
807 tested against chance level (two-sided t-test, \* $p < 0.05$ , \*\* $p < 0.01$ , \*\*\* $p < 0.001$ , Blank:  
808 Not significant). (K) Comparison of performance change following switch between all  
809 mice expressing TeNT-P2A-GFP and control mice described in Figure 1I (N=22 mice  
810 for TeNT and N=5 mice for control, two-sided unpaired t-test, \*\*\* $p = 0.0008$ ). (L)  
811 Learning rate averaged over the first three days following switch for mice expressing  
812 TeNT-P2A-GFP with impaired transfer learning and control mice described in Figure  
813 1L-M (N=22 mice for TeNT and N=5 mice for control, two-sided unpaired t-test, N.S.  
814  $p = 0.127$ ).

815

816

817

## 818 **Supplementary Materials:**

### 819 **Materials and Methods:**

#### 820 Animals

821 All experiments were carried out in accordance with the Institutional Animal Care and  
822 Use Committee of the University of Geneva and with permission of the Geneva  
823 cantonal authorities (GE/95/19). C57BL/6J and transgenic mouse lines with C57BL/6J  
824 background were housed 2–6 mice per cage under a 12/12-h non-inverted light/dark  
825 cycle with ad libitum access to food and water. Transgenic mice were obtained as a  
826 crossing between Ai148D mice (Jackson Laboratories, stock number 030328) and  
827 Rasgrf2-2A-dCre mice (Jackson Laboratories, stock number 022864). Ai148D mouse  
828 line is a Cre-dependent reporter line containing a gene encoding the calcium indicator  
829 GCaMP6f at the Igs7 locus. Exposure to Cre recombinase through viral vector  
830 injections or crossing with Cre-expressing mice resulted in expression of GCaMP6f.  
831 Rasgrf2-2A-dCre mouse line expressed a trimethoprim-inducible Cre recombinase  
832 directed by endogenous Rasgrf2 promoter/enhancer elements. When induced, Cre  
833 recombinase activity is observed in cortical layers 2/3 and other scattered cells of the  
834 cortex, hypothalamus, thalamus, and midbrain. Trimethoprim (TMP) i.p. injections  
835 were performed for 3 consecutive days at least two weeks before any surgical  
836 intervention (0.25 mg/g of body weight diluted in DMSO and 0.9% NaCl). As a result,  
837 TMP injected crossed Ai148DxRasgrf2-dCre mice expressed GCaMP6f in cortical  
838 layer 2/3. Both males and females of 2-6 months and a weight of approximately 20-25  
839 g were used for the experiments.

840

#### 841 Viral vectors and markers

842 For anterograde labeling, pAAV-CAG-GFP (Addgene, #37825-AAV2, titer:  $7 \times 10^{12}$   
843 vg/mL) and pAAV-CAG-tdTomato (Addgene, #59462-AAV2, titer:  $4 \times 10^{12}$  vg/mL) were  
844 used. Volumes of virus injected was usually 50-75nL in each site, without dilution.  
845 Brains were collected 3 weeks after the injections. For retrograde labeling, Cholera  
846 Toxin subunit B conjugated to Alexa Fluor 555 (Invitrogen, reference number C22843)  
847 and Alexa Fluor 647 (Invitrogen, reference number C34778) diluted in PBS were  
848 injected (~50nL in each site). Brains were collected 10 days after the injections. For  
849 both anterograde and retrograde labeling, the unique depth of injection was 400  $\mu$ m.  
850 For inactivation experiments, an AAV-DJ-CMV-eGFP-2A-TeNT virus was injected in  
851 the region of interest (Wu Tsai Neurosciences Institute, reference number GVVC-  
852 AAV-70) at 3 different depths along the cortical column (800  $\mu$ m, 500  $\mu$ m and 200  $\mu$ m  
853 respectively). Behavioral protocols started at least one month after the injections were  
854 done. For both anterograde and inactivation experiments, pictures of the injection sites  
855 were taken with the wide-field microscope before brain collection.

856

### 857 Stereotaxic surgeries

858 Pain management was performed by first administrating the opioid Buprenorphine  
859 subcutaneously (0.1 mg/kg) before starting the surgery. A local anesthetic was  
860 injected under the skin of the head before the surgical incision (mix  
861 Lidocaine/Bupivacaine, 6mg/kg and 2.5 mg/kg respectively). Mice were anesthetized  
862 inside an induction chamber with 3% isoflurane mixed with oxygen and then fixed on  
863 the stereotaxic apparatus (Model 940, Kopf). A custom-made nose-clamp has been  
864 adapted to the apparatus to maintain the position of the animal, allowing head rotation.  
865 Body temperature was constantly monitored through a thermic probe and adjusted to  
866 ~37°C via a heating pad placed below the mouse (DC Temperature Controller, FHC).

867 Breathing rate was regularly monitored by visual inspection. Ophthalmic gel (Vitamin  
868 A, Bausch Lomb) was applied on both eyes to ensure protection from light and prevent  
869 them from drying out. During the surgery, mice were anesthetized with a constant  
870 isoflurane level lowered around 2%. At the end of the surgery, an anti-inflammatory  
871 was also administered subcutaneously (Carprofen, 7.5mg/kg) and animals were  
872 warmed with a heating lamp for at least 15 minutes until recovery from anesthesia. A  
873 second anti-inflammatory (Ibuprofen, Algifor) was added to drinking water for 3-days  
874 post-op and the weight was checked daily to ensure that weight was kept above 15%  
875 of the original weight prior to the surgery. All animals were implanted with a cranial  
876 implant. After removing the skin and tissues on top of the head, the skull was cleaned,  
877 dried and thinned. The mouse head was tilted approximately at a 30° angle, ensuring  
878 a better access to the left hemisphere. A custom-made metallic implant was placed  
879 on the top of the skull using a custom-made holder. It was then fixed with a layer of  
880 glue (Loctite 401, Henkel) and additional layers of dental acrylic (Pala, Kulzer) to  
881 solidify the implant. Dental acrylic was covered with black nail polish to prevent light  
882 contamination from visual stimuli during imaging experiments. After at least 3 days of  
883 recovery, mice could undergo additional procedures. Animals that underwent imaging  
884 sessions were implanted with a custom-made glass window composed of a bigger top  
885 round cover slip of 7 mm diameter respectively and two superimposed 5 mm diameter  
886 cover slips, respectively. The three concentric cover slips were glued together with UV  
887 glue (Optical Adhesive n°68, Norland). The craniotomy was the size of the smaller  
888 window and was drilled around the region of interest. Before removing skullcap, we  
889 used a custom-made perfusion chamber with saline solution (NaCl 0.9%) to rinse the  
890 craniotomy continuously and reduce bleeding stains. A custom-made holder with air-  
891 suction was used to hold and position the window. The cranial window was gently  
892 brought down until it was in contact with the brain. The window was then fixed with UV

893 glue, super glue and dental acrylic. For stereotaxic injections, glass pipettes (5-000-  
894 2005, Drummond) were pulled (Model P-97, Sutter Instrument Co) and further broken  
895 to obtain a tip of ~10-15 $\mu$ m inner diameter and further beveled to create a sharp tip  
896 and avoid cortical damage during insertion. Injection sites were determined using  
897 functional mapping. Injections were done using a single-axis oil hydraulic  
898 micromanipulator (R.MO-10, Narishige). The pipette was slowly inserted inside the  
899 cortex until reaching the desired depth. Viruses or toxins were injected at a speed of  
900 ~2nL/s. When the whole volume was injected, we waited 5 minutes with the pipette in  
901 the same position before gently removing it.

902

### 903 Behavioral training

904 A Matlab custom-made graphical user interface (GUI) was developed from the Matlab  
905 App Designer in order to control the behavioral tasks and monitor performance. The  
906 GUI allowed real time visualization of the animal's performance and online  
907 modification of the parameters (e.g. stimuli parameters, punishment duration, stimuli  
908 proportion). Animals underwent water restriction 2 to 4 days before the training started  
909 and were handled every day by the experimenter for at least 10 minutes. During the  
910 pre-training phase, mice were habituated to head-fixation and placed on the setup. In  
911 the first session, only go trials were presented with 100% reward probability. Go trials  
912 proportion was progressively reduced and nonrewarded trials were added the  
913 following sessions. Mice were trained once per day every day at the same hour.

914 Six different behavioral tasks (two tactile tasks, two visual tasks and two auditory  
915 tasks) were used for our experiments (Fig. 1), all following a Go/No go discrimination  
916 paradigm. In the tactile tasks, two whiskers ("top" whisker B2 and "bottom" whisker

917 C2) were inserted inside glass capillaries each attached to a piezo actuator that could  
918 create a small deflection of about 1 mm along the rostro-caudal axis. In one version of  
919 the task, B2 whisker stimulations were associated to a reward (go trials). In the other  
920 version, C2 whisker stimulations were the go trials. In the visual tasks, two drifting  
921 squares (a “top” square and a “bottom” square, relative to a midline in the mouse visual  
922 field) were presented on the screen. In one version of the task, top square stimulations  
923 were the go trials while in the other version of the task, bottom squares stimulations  
924 were the go trials. The total trial duration of a single trial was 4 s: after a 2 s quiet  
925 window (during which licking resulted in trial abortion) the stimulus was presented, and  
926 the mouse was allowed to lick during a 2 s response window. During go trials, the  
927 mouse could obtain a water reward upon licking the spout following the stimulus (Hit  
928 trials). Failure to lick would result in Miss trials. During No go trials, the mouse had to  
929 refrain from licking (Correct rejection trials, CR) or it was punished with a time-out of  
930 10 s (False Alarm trials, FA). Some trials were presented without stimulus presentation  
931 (catch trials). If the mouse licked during catch trials, no time-out was applied. If mice  
932 were too compulsive (i.e. licking during the quiet window too frequently), a 10sec time-  
933 out early lick punishment could also be applied. The proportion of each trial type was  
934 the following: Go trials = 30%, No go trials = 50%, Catch trials = 20%. All tactile stimuli  
935 were generated through Matlab data acquisition toolbox controlling a piezo actuator  
936 (Bimorph bendor piezo actuator PB4NB2S, Thorlabs) through a National Instrument  
937 card. All visual stimuli were generated using Matlab and PsychToolBox. Stimuli were  
938 presented on a gray background through a LCD monitor (20x15cm, pixels, 60Hz  
939 refresh rate, Pi-shop) positioned 10 cm from the eye, with a 30° angle to the right of  
940 the midline. The screen was also tilted with a 30° angle along the horizontal plane to  
941 match the mouse head angle with the intent of roughly aligning the bottom and top  
942 parts of the screen to the resting position of the C2 and B2 whiskers in the mouse

943 visual field. Stimulations during behavior consisted in black squares moving through  
944 the screen in the rostral-caudal direction (bar width was  $15^\circ$ , stimulus duration was  
945 175ms, speed was  $500^\circ/\text{sec}$ ), on a gray background. Finally, an auditory task was  
946 considered following the same structure as the other tasks but using two short tones of  
947 6 kHz and 12 kHz as Go and No go stimuli, respectively. These tones were delivered  
948 from a speaker located next to the mouse on the same side as the visual and tactile  
949 stimuli.

950

### 951 Wide-field microscopy

952 We used a custom-made wide-field epifluorescence microscope setup (54) including  
953 a sCMOS camera (ORCA-Flash4.0 V3, Hamamatsu). Magnification was determined  
954 through a 0.63X C-mount camera adapter for Olympus Microscopes. The field of view  
955 size was 5.6 mm x 5.6 mm. The camera and adapters were mounted on a base  
956 allowing vertical movement with manual focus. LED white illumination (740mW,  
957 1225mA, Thorlabs) could be controlled via a T-Cube LED driver (LEDD1B, Thorlabs).  
958 Filter cubes could be changed for different type of imaging. For imaging GCaMP6f,  
959 GFP excitation, emission and dichroic filters were used. For imaging intrinsic signals,  
960 Cy3/5 excitation, emission and dichroic filters were used. Objective (MVX Plan  
961 Apochromat with 2x, Olympus) was attached to the microscope base. The  
962 somatotopic mapping consisted in repetitive rostral-caudal pulsatile deflections ( $\sim 1$   
963 mm amplitude) of either B2 or C2 whiskers for 20-80 trials followed by quiet window.  
964 The retinotopic mapping protocol consisted of drifting bars. A contrast reversing  
965 checkerboard was presented within the bar to better drive neural activity ( $0.04 \text{ cyc}/^\circ$   
966 of spatial frequency and 2 Hz of temporal frequency). In each trial the bar was swept  
967 in the four cardinal directions: left to right, right to left, bottom to top, and top to bottom.

968 Single trials were repeated in average 20-40 times. For anatomical experiments, only  
969 C57BL/6J mice were used. To record the intrinsic optical signal, we used longer tactile  
970 stimulations and slower visual stimulations. Mice were fixed on the platform and  
971 anesthetized during the procedure with isoflurane level lowered to 1%. Body  
972 temperature was monitored with a probe and adjusted to 37°C using a heating pad  
973 (DC Temperature Controller, FHC). For all the other experiments, we used Ai148D x  
974 Rasgrf2-2A-dCre mice and *in vivo* calcium imaging. The visuo-tactile sparse noise  
975 protocol consisted in combinations of visuo-tactile stimuli: three whisker conditions (C2  
976 whisker, B2 whisker and no whisker), eight vertical positions of the moving square.  
977 The ninth position corresponded to a no visual stimulus condition (i.e. blank screen).  
978 Visual and tactile stimulus onsets were either synchronous or delayed (150ms delay  
979 visual leading tactile stimulus). In total, 54 different combinations were presented in  
980 pseudo-random order with a 1 sec interval, and the full sequence was repeated 60  
981 times. Total sparse noise protocol duration was approximately 1 hour. At the beginning  
982 of each recording, a picture of the window's surface with blood vessels pattern on  
983 focus was taken as reference image and the focus was then set ~300µm under the  
984 surface to maximize signal collection. Light was adjusted to prevent saturation. Before  
985 each imaging session, the window was cleaned with 70% ethanol and eyes hydrated  
986 with mineral oil.

987

## 988 Two-photon microscopy

989 The two-photon microscope was custom-made (INSS Company). It consisted in a  
990 femtosecond laser with wavelength range 690-1040nm (Tunable Ti:Sapphire with  
991 dispersion compensation MaiTai DeepSee, Spectra Physics) which beam was  
992 displaced with Resonant/Galvo scan mirrors (INSS) and the emitted signals were



993 detected with 2 GaAsP amplified PMTs (PMT2101/M, Thorlabs). Imaging was  
994 performed through ScanImage (Vidrio Technologies). Images were acquired at  
995 approximately 30 frames per second. Two-photon calcium recordings during the  
996 visuo-tactile sparse noise protocol described in the wide-field section were performed  
997 on N=25 Ai148D x Rasgrf2-2A-dCre mice. After cleaning the glass window, a  
998 hydrophobic chamber was made between the head plate and the imaging platform  
999 using liquid plastic (Smooth-Cast 325, Smooth-On) and the objective was immersed  
1000 in distilled water. We ensured no polluting light could reach the objective by covering  
1001 it with a dark protection and by turning off the light room. At the beginning of each  
1002 recording, an anatomical picture of the field of view was taken with a LED. When  
1003 switching the microscope in two-photon mode, we took a picture of the surface blood  
1004 vessels at magnification x1 and x1.5 for further realignment. For each field of view, we  
1005 usually recorded at three different depths ranging between 300  $\mu$ m and 50  $\mu$ m below  
1006 the surface. No more than two recordings were done during a day on the same animal.

1007

## 1008 Histology

1009 Mice were anesthetized with 3% isoflurane and euthanized with i.p. pentobarbital  
1010 injection (Eskornarkon, 150mg/kg). They were then transcardiacally perfused using a  
1011 peristaltic pump (ISM829, Cole-Parmer) with 0.01 M PBS, pH 7.4 for 2 min, and then  
1012 4% paraformaldehyde (PFA) in phosphate buffer (PB; pH 7.4) for 3 min. The brains  
1013 were post-fixed at 4°C in PFA for 48h and then transferred into PBS. For anatomical  
1014 experiments of Figure 2, the brains were post-fixed at 4°C in PFA for 2h and washed  
1015 3x15min in PBS. The left cerebral hemisphere was separated from the right  
1016 hemisphere and subcortical parts were removed with a spatula. The left hemisphere  
1017 was flattened between glass slides and kept flattened at 4°C in PFA for 12h. Flattened

1018 hemispheres were embedded in agar gel 4% before cutting slices of 60µm thickness  
1019 with a vibratome (VT 1000 S, Leica). The sections were mounted on glass slides using  
1020 mounting medium with DAPI (ab104139, Abcam), coverslipped and kept in dark at  
1021 4°C until further imaging.

1022

### 1023 Immunohistochemistry

1024 Brain sections were incubated with slight agitation (40 rotations/min) for 2h at room  
1025 temperature in a saturation/permeabilization solution containing a mix of 5% BSA and  
1026 NGS, 0.3% triton X-100 and PBS. Brain sections were then incubated with slight  
1027 agitation (40 rotations/min) overnight at 4°C with a rat anti-muscarinic acetylcholine  
1028 receptor m2 primary antibody (1:500, Sigma-Aldrich, reference number MAB367) in  
1029 the same blocking solution. Sections were washed 3x15min in PBS before a 2h  
1030 incubation with either a donkey anti-rat secondary antibody conjugated with Alexa  
1031 Fluor 488 (dilution 1:500, Invitrogen, #A21208) or with a goat anti-rat secondary  
1032 antibody conjugated with Cy5 (dilution 1:500, Invitrogen, #A10525) in blocking solution  
1033 at room temperature without agitation. Hoechst solution (dilution 1:1000, Invitrogen, #  
1034 33342) was used for fluorescent nuclear counterstaining (Fig. 2M-O).

1035

### 1036 Histological imaging

1037 Slices were mounted on Superfrost microscope slides (EpreDia) with mounting  
1038 medium (Fluoromount) and covered with 24x50 mm coverslips (Menzel-Gläser). All  
1039 photomicrographs were taken using a Zeiss Axio Scan.Z1 or a Zeiss Confocal  
1040 LSM800 Airyscan at the bioimaging platform of the University of Geneva.

1041

1042 Wide-field calcium imaging analysis - retinotopic and whisker mapping protocols

1043 Responses to drifting checkerboard stimuli were averaged across trials for each  
1044 condition and converted in  $df/f$  using a pre-stimulus time window as baseline. Azimuth  
1045 and elevation preference maps were then computed as in (28). To segment visual  
1046 areas, azimuth and elevation maps were combined to generate a visual field sign map.  
1047 The sign map was computed as the sine of the difference between the vertical and  
1048 horizontal retinotopic gradients for each pixel. Somatotopic maps were obtained by  
1049 averaging the response  $df/f$  across B2 or C2 stimulation trials over a short time window  
1050 of 200ms.

1051

1052 Wide-field calcium imaging analysis – sparse noise protocol

1053 After an initial down sampling to a resolution of 100 x 100 pixels by bicubic  
1054 interpolation, 50 Hz framerate fluorescence videos acquired during the sparse noise  
1055 protocol underwent pixelwise notch filtering ( $f_0=12$  Hz,  $f_w=6$  Hz) and discrete wavelet  
1056 transform (DWT) detrending (setting lowest frequency approximation coefficients to  
1057 zero in a 6-level decomposition) to remove artifacts and low-frequency drifts. After  
1058 these initial preprocessing steps, videos were z-scored using as reference  
1059 distribution the ensemble of all pixel values corresponding to blank stimuli (i.e. trials  
1060 with no visual and no tactile stimulation). Next, trials with a high baseline activity ( $\geq 0.5$   
1061 z-score on average, corresponding to a bump of spontaneous activity preceding the  
1062 stimulus) were discarded and z-scoring and baseline subtraction was performed again  
1063 including only remaining trials. Starting from the z-scored data obtained in this way,  
1064 response surprises (i.e.  $-\log_{10}(p_{t-test})$ ) across trials were computed for each time

1065 samples and each stimulus in order to define spatial responsivity masks. Average  
1066 visual or tactile top or bottom response videos were calculated by averaging the  
1067 median responses across trials to the relevant stimuli. For “visual top” all stimulation  
1068 conditions (either unimodal or multimodal) in which the visual stimulus was present in  
1069 positions 7 or 8 of our grid were used whereas for “visual bottom” all visual conditions  
1070 including positions 3 or 4 were used. Retinotopic and somatotopic difference maps  
1071 like the ones shown in Figure 2F-G and Supplementary Fig. S4D were obtained by  
1072 taking the difference between average visual top and bottom response videos.  
1073 Modality preference maps (Fig. 2H and Supplementary Fig. S4D) were obtained by  
1074 taking an element-by-element max between the top and bottom videos of a given  
1075 modality and subtracting to the result the same operation in the other modality. This  
1076 was normalized by the sum of the same elements. Multisensory enhancement maps  
1077 (Fig. 2J and Supplementary Fig. S4D) were obtained by taking an element-by-element  
1078 max between the average unimodal response video to V and T (all positions) as  
1079 “predicted response” and subtract it to the “observed response” obtained as the  
1080 average of all VT conditions. Retinotopy-somatopy spatial coherence maps (Fig. 2I)  
1081 were computed by convolutionally (stride = 1 patch size = 8 pixels) calculating the  
1082 correlation-based similarity of matching patches of the two difference maps taken as  
1083 input and then scaling the result by their average peak-to-peak range (to make it more  
1084 noise robust). Pixel level comparison of grand average maps (Fig. 2K-L) where  
1085 performed on responsive pixels (average surprise threshold defined such as response  
1086  $p_{t\text{-test}} \leq 0.05$ ) comparing pixels with preference or coherence value significantly  
1087 different or not from zero (threshold  $p_{t\text{-test}} = 0.05$  across mice). Grand average maps  
1088 displayed in Figure 2F,G,J are obtained by averaging frames of the corresponding  
1089 grand-average video (obtained by realigning single mouse ones to the common atlas  
1090 and averaging) in different windows: frames 16 to 20 for the somatotopy (V-T delay =

1091 0 s), 26 to 30 for retinotopy (0 ms V-T delay condition) and 19 to 23 for modulation  
1092 (150 ms V-T delay condition). These windows were chosen to roughly match the peak  
1093 of the signal. Signal time courses displayed in Supplementary Fig. S4E-H were also  
1094 obtained by integrating grand-average videos over regions of interest defined by the  
1095 intersection of an area-based mask (obtained from the common atlas) and  
1096 spatiotemporal responsivity mask selecting pixels with average (across mice) max  
1097 (across relevant conditions) response surprise above a given threshold  
1098 (corresponding to  $p_{t\text{-test}} \leq 0.01$ ). This was done to include only the responsive  
1099 subregions of each area at every given timepoint. To measure angular mismatch  
1100 between retinotopic and somatotopic maps we computed elevation gradient vectors  
1101 from the grand-average version of these maps (using Matlab “gradient” function with  
1102 a scale of 4 pixels followed by a gaussian smoothing of gradient components). Then  
1103 a region of interest overlapping with RL was defined and we computed the average  
1104 angular difference between the two gradient fields limited to pixels within it.

1105

#### 1106 Atlas fitting and registration

1107 The reference Allen Institute mouse brain atlas (55) projected to match the skull tilt in  
1108 our experiments was manually fitted to the wide-field imaging field-of-view for each  
1109 mouse by visually aligning the atlas boundary lines to reproducible landmarks from  
1110 functional maps. Both the maps obtained from the sparse noise protocol (i.e. vertical  
1111 retinotopy and somatotopy difference maps) and from the whisker and retinotopic  
1112 mapping protocols were used to register the atlas. Landmarks used include the  
1113 outlines of the sign map regions, the position of C2 and B2 whisker activity bumps in  
1114 S1 and S2, the reversal of vertical retinotopy at the boundary of each visual area (see  
1115 Supplementary Figure S4 for examples). To be able to reconnect microscale and

1116 macroscale level information conveyed by two-photon and wide-field imaging  
1117 experiments, we also manually reconstructed the position of each two-photon field-of-  
1118 view (FOV) in the frame of reference of the atlas fitted to the wide-field microscope  
1119 FOV. To do so, we aligned the blood vessel pattern visible in each two-photon FOV  
1120 with the one visible in the wide-field blood vessels image (as shown in Supplementary  
1121 Fig. S6F). To pull information across mice and compute grand averages, we developed  
1122 a Matlab pipeline to robustly realign atlases to one another. This pipeline is based on  
1123 iterative application of the image registration algorithm implemented by Matlab  
1124 function “imregtform” (considering “rigid” transformations in “monomodal” mode) to  
1125 stacks of atlas boundary images. This pipeline enabled us to obtain the rotation and  
1126 shift required to register all maps and neuron positions from one mouse to the frame  
1127 of reference of a common atlas. For the tracing experiments performed in Figure 2M-  
1128 O, a similar processing was performed with ImageJ using registration of atlases fitted  
1129 using the M2AChR staining. Brain from all mice with similar injections could then be  
1130 averaged together after highlighting projections structures with the function “unsharp  
1131 mask” to highlight small structures away from the injection site.

1132

### 1133 Two-photon calcium imaging analysis

1134 To extract time-varying somatic calcium signals, we used the Suite2p toolbox (56).  
1135 Neuropil contamination was corrected by subtracting the fluorescent signal from a  
1136 surrounding ring  $F_{\text{Surround}}(t)$  from somatic fluorescence:  $F(t) = F_{\text{Soma}}(t) - \alpha * F_{\text{Surround}}(t)$   
1137 with  $\alpha=0.7$ . Neuropil-corrected fluorescence signals  $F(t)$  were then converted in z-  
1138 score by subtracting from each trace the mean value and dividing by its standard  
1139 deviation of  $F(t)$  over the samples contained in the last 0.2 s of the baseline window  
1140 preceding the stimulus (pooling across all trials). Starting from these z-scored

1141 fluorescence traces we computed response surprises (i.e.  $-\log_{10}(p_{t\text{-test}})$ ) across trials  
1142 for each timesamples of each stimulus. Similarly, we computed the coefficient of  
1143 variation (CV) across trials quantifying response variability. Neuron was considered  
1144 reliably responsive to a given stimulus if the surprise exceeded the threshold  $\text{Surprise}_{\text{th}}$   
1145  $= 8$  (i.e.  $p_{t\text{-test}} \leq 10^{-8}$ ) while remaining below a coefficient of variation threshold value  
1146  $\text{CV}_{\text{th}} = 4$  for at least 4 consecutive time bins. Neurons responsive to at least one  
1147 stimulus condition were considered “responsive” and included in subsequent analyses.  
1148 Neurons responsive in at least one tactile-only condition (i.e. in absence of visual  
1149 stimulation) are considered “tactilely responsive”. Neurons responsive in at least one  
1150 visual-only condition (i.e. in absence of visual stimulation) are considered “visually  
1151 responsive”. Neurons satisfying both conditions were considered “multimodal”  
1152 neurons (and used for the analyses displayed in Figure 3). Observed multisensory  
1153 responses were compared to a “max model” of multisensory interaction (10) (as in Fig.  
1154 3D). Predicted visuo-tactile z-scored traces for each multisensory stimulus condition  
1155 were computed trial-wise by taking the max (for each timebin) of the observed  
1156 response traces observed in response to the same visual and tactile stimulus  
1157 presented alone (i.e. the corresponding unimodal conditions) and subsequently  
1158 averaging across trials. Average responses (predicted or observed) were computed  
1159 over a response window spanning from 0.2 s to ~0.7 s following stimulus onset for  
1160 each stimulus and each responsive neuron. Preferred vertical position in the tactile or  
1161 visual space of each neuron was quantified as the center of mass of these average  
1162 responses along the corresponding dimension of the stimulus grid, either restricting to  
1163 unimodal or multimodal (observed or predicted) conditions. For further analysis and  
1164 visualization (as in Fig. 4A,B,E) this center of mass was converted in a “position  
1165 preference index” ranging from +1 for neurons tuned to the top visual/B2 whisker  
1166 stimulus to -1 for neurons tuned to the bottom visual/C2 whisker stimulus. The

1167 sharpness of positional tuning of the neurons was assessed computing visual (as the  
1168 inverse of the best fit sigma parameter of a gaussian fit of the average response to  
1169 each visual position) and tactile (as the absolute value of the tactile position selectivity  
1170 index described above) selectivity indices. These indices range from 0 for a neuron  
1171 responding equally to all positions (i.e. completely positionally untuned neurons) to 1  
1172 for a neuron responding to only one position (i.e. maximally positionally tuned neurons).  
1173 Figure 3E shows the value of the above-mentioned positional preference indices  
1174 computed on the predicted and observed multisensory conditions whereas Figure 3F  
1175 shows the value of the above-mentioned selectivity indices for the preferred (i.e. max  
1176 response) multisensory condition. Neurons were labeled as ventral or dorsal by  
1177 running a k-means clustering algorithm (with  $n_{\text{centroids}}=2$ ) on the spatial distribution of  
1178 multimodal neuron over the surface of dorsal cortex (displayed in Figure 3C).

1179

## 1180 Behavioral analysis

1181 To quantify mouse behavior over time within single sessions we isolated different  
1182 stimulation conditions (i.e. Go trials, No go trials and Catch trials) to compute a  
1183 smoothed conditional lick probability over a sliding window of 60 trials. The identity of  
1184 Go and No go stimuli depends on the task condition and vary across mice groups and  
1185 switch days. Conditional lick probabilities or “lick rates” for short, were calculated as  
1186 the number of times a mouse licked in a stimulus condition divided by the number of  
1187 occurrences of that given condition over the sliding window. These curves are the  
1188 ones displayed in Figures 1 and 4 and Supplementary Figure S1-3 and are labelled  
1189 “Top”, “Bottom” and “Spont”. From Go and No go lick rates, we also computed a  
1190 “Performance” variable as the percentage of correct trials for discrimination.  
1191 Specifically, we defined behavioral performance as the average between the rate of



1192 correct choices upon delivery of the Go stimulus (i.e. Hit rate = lick rate for Go trials)  
1193 and the rate of correct choices upon delivery of the No go stimulus (i.e. Correct Reject  
1194 rate =  $1 - \text{False Alarm rate}$  where False Alarm rate = lick rate for No go trials). This  
1195 way of computing performance makes it insensitive to the proportion of Go and versus  
1196 No go trials. Following a similar logic, we defined a “Detection” performance as the  
1197 max between the average of Hit rate and Catch Correct Reject rate (i.e. the Go  
1198 detection rate) and the one of False Alarm rate and Catch Correct Reject rate (i.e. the  
1199 No go detection rate). Behavioral states were classified as previously described in (29).  
1200 Average rates and performance per session were computing only during engaged  
1201 trials of each session (i.e. cutting the final part of the session in which the lick rate of  
1202 animals drops due to task disengagement). Switch-aligned performance trajectories  
1203 shown in Figure 1 and 4 and Supplementary Fig. S1, S3 and S7 were obtained  
1204 realigning the curve of average performance and rates around the day of the task  
1205 switch. Accompanying barplots display the difference of discrimination and detection  
1206 performance between the last day of pre-switch behavior and the first day after switch.  
1207 In Supplementary Figure S2 the average rates, performance and detection trajectories  
1208 across mice that underwent whisker removal control sessions are shown. These  
1209 average curves were obtained by dividing each session in three chunks: “before”,  
1210 “during” and “after” whisker removal and averaging them separately after a stretching  
1211 interpolation to match their length. Accompanying barplots display the average  
1212 discrimination and detection performance in these three chunks (excluding boundary  
1213 timepoints to avoid contamination due to the temporal smoothing induced by the  
1214 sliding window we used to compute the rates). Learning rates following switch (Fig.  
1215 1N and Fig. 4L) were obtained averaging the slope of the best fitted line for the 3 days  
1216 after switch for all mice in each group, when necessary, excluding animals not showing  
1217 a drop to chance level the day after the switch. The relationship between the TeNT-

1218 P2A-GFP expression overlap with each brain areas and the congruent cross-modal  
1219 transfer learning impairment was assessed using Pearson correlation. Specifically, we  
1220 calculated the Pearson correlation coefficient between two vectors: 1) the vector  
1221 representing the fractional overlap of TeNT expression binary masks (displayed in  
1222 Supplementary Fig. S7E) and each atlas-defined brain area for each mouse, and 2)  
1223 the vector representing the change in performance following a task switch for each  
1224 mouse (performance averaged over 3 days after switch). This analysis was performed  
1225 for each brain area (examples for areas RL and AL are shown in Supplementary Fig.  
1226 S7F) and displayed as a correlation map in Fig. 4E. With a similar aim, inspired by  
1227 reverse correlation techniques, we computed the difference between the average of  
1228 all TeNT-injected mice expression binary masks (see next section) and the one of  
1229 mice displaying impairment of cross-modal transfer ability (defined as mice performing  
1230 below 55% of correct trials on average in the first day after congruent switch). This  
1231 difference will take null or negative values in areas where the manipulation does not  
1232 affect the behavior and positive values in regions important for producing the  
1233 behavioral effect (i.e. regions where TeNT expression is enriched in the impairment-  
1234 triggered ensemble compared to the all TeNT mice one).

1235

### 1236 Quantification of TeNT expression and ventral/dorsal grouping

1237 Wide-field fluorescence images of dorsal cortex displaying the pattern of expression  
1238 of TeNT-P2A-GFP in each injected mouse were first preprocessed in order to remove  
1239 the blood vessels from the surface. This was necessary to obtain a smooth, non-  
1240 occluded estimate of the spatial profile of construct expression across the surface of  
1241 cortex below the cranial window. To do so we first segmented the blood vessels with  
1242 adaptive thresholding (using Matlab function “adapthresh”) and then inpaint them by

1243 local interpolation (using Matlab function “regionfill”) (Fig. 4A-B and Supplementary  
1244 Fig. S7A-D). Next, we computed a median-subtracted map of  $df/f$  calculated with  
1245 respect to a manually annotated region of interest on the border of each window  
1246 (selected to correspond to a fluorescence profile stable around baseline level, usually  
1247 at the farthest end of the window with respect to the injection site). To make the images  
1248 acquired in different mice comparable despite potential differences in imaging  
1249 conditions we artificially re-saturated all images at the same level - i.e. clipping the  
1250 values in the map of each mouse to the minimum (across mice) max value (within  
1251 each map). After normalizing these resaturated  $df/f$  maps to 1 we computed their 0.90  
1252 contour to define the binary TeNT expression mask to be used in subsequent analyses  
1253 to evaluate the spatial extent of toxin expression. The overlay of these masks for all  
1254 mice is displayed in Supplementary Fig. S7E. Next, TeNT injected mice were  
1255 subdivided in “dorsal” and “ventral” expression subgroups by computing a d-prime  
1256 measure (distance normalized by patch size) with respect of the two multimodal  
1257 neuron clusters found by k-means in the two-photon analysis of Figure 3. Neurons  
1258 outside the region of low d-prime with patch centroid falling respectively within AL/LI  
1259 or A/RL respectively were categorized as ventral and dorsal respectively (Fig. 4G and  
1260 I show the overlay of the binary masks together with their centers as dots over the  
1261 common atlas).

1262

### 1263 Quantification and statistical analysis

1264 Statistical details of experiments and analysis are described in figure legends and in  
1265 the Results section. Details include statistical tests used, sample type and number as  
1266 well as definition of bar plots and error bars. In figure legends, standard error of the  
1267 mean (S.E.M.) is specified when plotted as error bars. Paired or unpaired t-tests were

1268 used to assess significance of mean comparisons (implemented by Matlab functions  
1269 “ttest” and “ttest2” respectively). Normality tests were not performed systematically but  
1270 individual data points were plotted to visualize distributions. Wilcoxon signed rank test  
1271 were used to assess significance in paired median comparisons (implemented by  
1272 Matlab function “signrank”). Wilcoxon rank sum test was used for unpaired median  
1273 comparisons (implemented by Matlab function “ranksum”). Pearson correlation  
1274 coefficient was used to compute correlations between two conditions (implemented by  
1275 Matlab function “corr”). Across all fits reported uncertainties (i.e. confidence intervals)  
1276 for best-fit parameter values were extracted fit covariance matrices (fitting was  
1277 performed using Matlab function “nlinfit”).

1278

1279

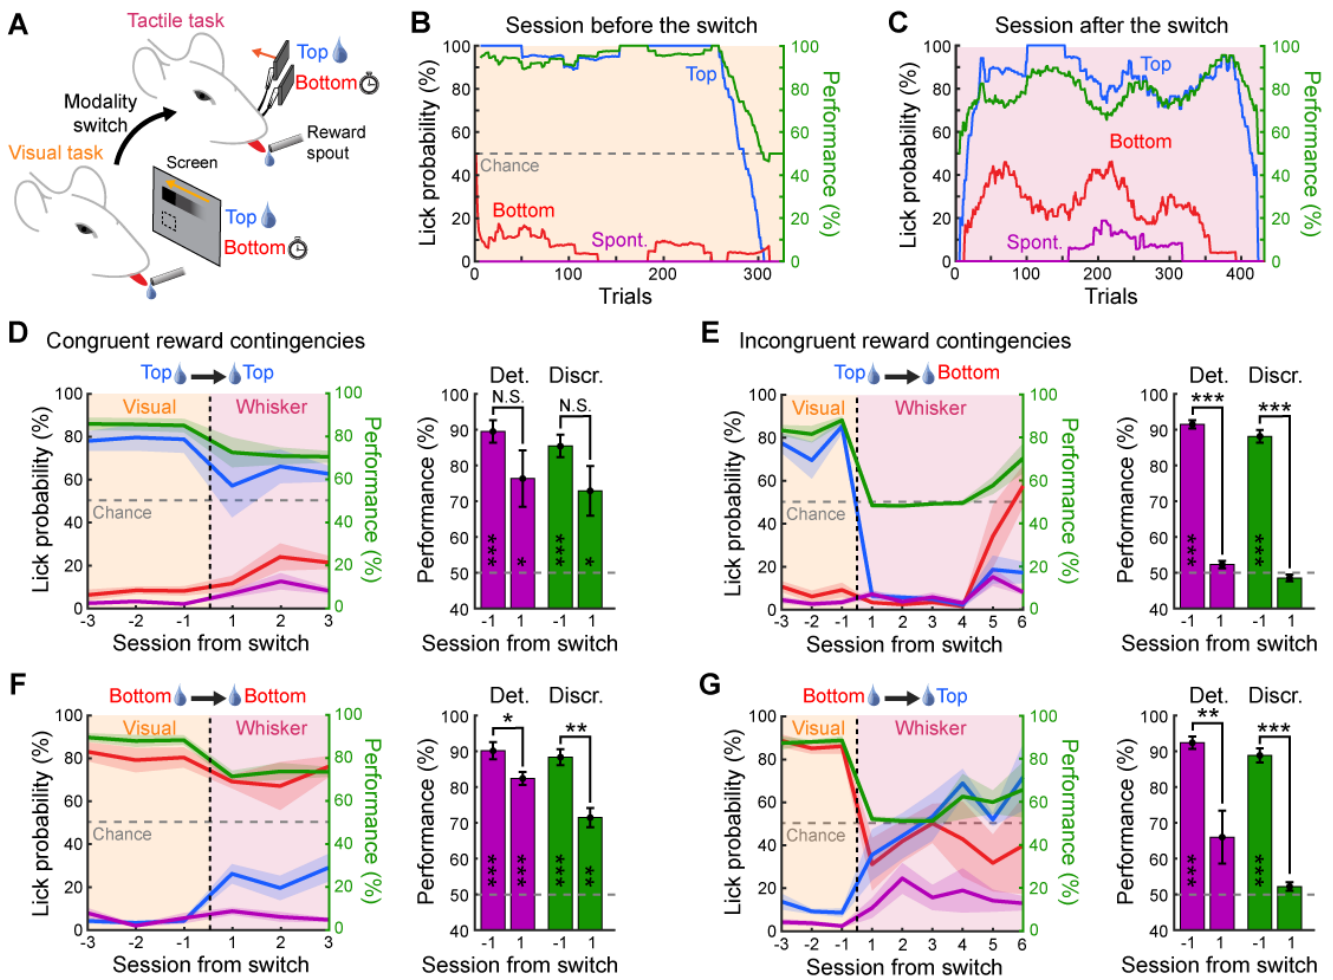

Figure S1

1280 **Fig. S1. Cross-modal transfer learning in mice after a switch from a visual**  
1281 **discrimination task to a whisker discrimination task.**

1282 **(A)** Schematic of behavioral paradigm for cross-modal transfer learning between a  
1283 visual task to a whisker-based tactile task. **(B)** Example session taking place the last  
1284 day before modality switch for an expert mouse at the visual discrimination task where  
1285 the top stimulus is rewarded upon licking. Lick probabilities over trials are shown for  
1286 the top square (blue), the bottom square (red) and in absence of stimuli (pink).  
1287 Performance computed as the percentage of correct discrimination trials (see  
1288 Methods) is shown in green. Performance chance level is indicated with a gray dashed  
1289 line. Traces shown were computed using a sliding window of 60 trials. **(C)** Same as **B**  
1290 for the first session after modality switch to a whisker discrimination task with  
1291 congruent reward contingencies. **(D)** Average daily task performance and lick rates  
1292 across days for mice population (N=5 mice) switching from the visual task to the  
1293 whisker task with congruent reward contingencies where the top stimulus is rewarded.  
1294 Shaded area: S.E.M. Black dashed line indicates the switch between modalities. Color  
1295 code as in **B**. Histograms in the right indicate the detection (purple) and discrimination  
1296 (green) performance distribution the day before and after the switch (paired two-sided  
1297 t-test comparing days, \* $p < 0.05$ , \*\* $p < 0.01$ , \*\*\* $p < 0.001$ , N.S. Not significant).  
1298 Performances are also tested against chance level (two-sided t-test, \* $p < 0.05$ , \*\* $p < 0.01$ ,  
1299 \*\*\* $p < 0.001$ , Blank: Not significant). **(E)** Same as **D** but for a modality switch with  
1300 incongruent reward contingencies between the visual and whisker task where the top  
1301 visual stimulus was rewarded (detection after switch,  $p = 0.098$ ; discrimination after  
1302 switch,  $p = 0.196$ , N=5 mice). **(F)** Same as **D** but for modality switches where bottom  
1303 visual stimuli are rewarded. **(G)** Same as **E** but for modality switches where bottom

1304 visual stimuli are rewarded (detection after switch,  $p=0.096$ ; discrimination after  
1305 switch,  $p=0.143$ ,  $N=5$  mice).

1306

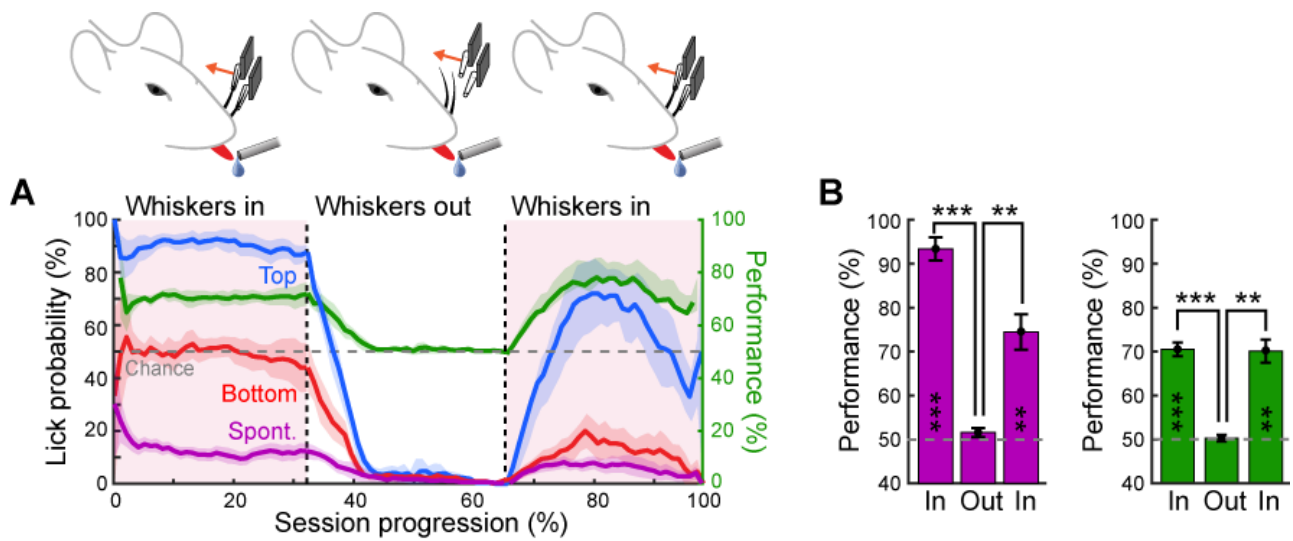

Figure S2



1307 **Fig. S2. Mice performance at the whisker discrimination task with and without**  
1308 **whiskers in the capillary tubes used to deliver tactile stimulations.**

1309 **(A)** Behavioral responses during the whisker discrimination task averaged across  
1310 expert mice (N=5 mice). Sessions were normalized between beginning (0%) to end  
1311 (100%) before average. Color code is the same as in Figure 1G. In these sessions,  
1312 mice were performing the task for about a third of the session before whiskers were  
1313 removed from the capillary tubes which however remained in their position. The task  
1314 was then continued for the same duration before reinserting the whiskers back in the  
1315 tubes to control that mice are still motivated to perform the task.

1316 **(B)** Comparison of detection (purple) and discrimination (green) performance during  
1317 the 3 different phases of the session described in A. Comparison between consecutive  
1318 phases (paired two-sided t-test, \*\*\* $p < 0.001$ , \*\* $p < 0.01$ , \* $p < 0.05$ ) and with chance level  
1319 (two-sided t-test with  $p = 0.188$  for detection and  $p = 0.710$  for discrimination during the  
1320 Out phase) are performed. Mice are not able to perform the task in absence of direct  
1321 whisker stimulations.

1322

1323

1324

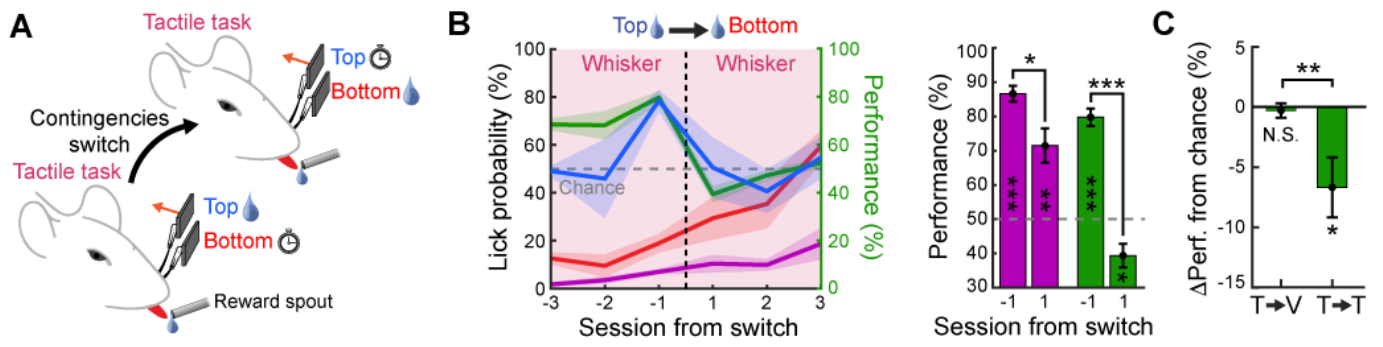

Figure S3

1325 **Fig. S3. Relearning to perform the whisker discrimination task after reward**  
1326 **contingencies switch within the same modality.**

1327 **(A)** Schematic of behavioral paradigm for reward contingencies switch within the same  
1328 whisker modality. Once mice become expert at the whisker discrimination task where  
1329 the top whisker is rewarded upon licking, the reward contingencies are reversed so  
1330 that the bottom whisker is now associated to a reward. **(B)** Task performance  
1331 averaged over whole sessions across days for mice population (N=7 mice) with  
1332 reversed reward contingencies. Shaded area: S.E.M. Black dashed line indicates the  
1333 transition from one task to another. Histograms in the right indicate the detection  
1334 (purple) and discrimination (green) performance distribution the day before and after  
1335 the switch (paired two-sided t-test comparing days, \* $p < 0.05$ , \*\* $p < 0.01$ , \*\*\* $p < 0.001$ , N.S.  
1336 Not significant). Performances are also tested against chance level (two-sided t-test,  
1337 \* $p < 0.05$ , \*\* $p < 0.01$ , \*\*\* $p < 0.001$ , Blank: Not significant). **(C)** Comparison of performance  
1338 change relative to chance level after reward contingencies switch between modalities  
1339 (tactile to visual) or within whisker task (N=10 mice for visuo-tactile and N=7 mice for  
1340 tactile only, unpaired two-sided t-test, \* $p = 0.668 \cdot 10^{-3}$ ). Mice continue to respond to  
1341 whisker stimulations significantly above chance level but perform the discrimination  
1342 significantly below chance level. This indicates that they exhibit less flexibility or  
1343 response suppression for reverse reward contingencies within the same modality. This  
1344 could be cause to a stronger habitual component on the previous rewarded whisker  
1345 or a pre-existing prior on the relevance of the whisker stimulations.

1346

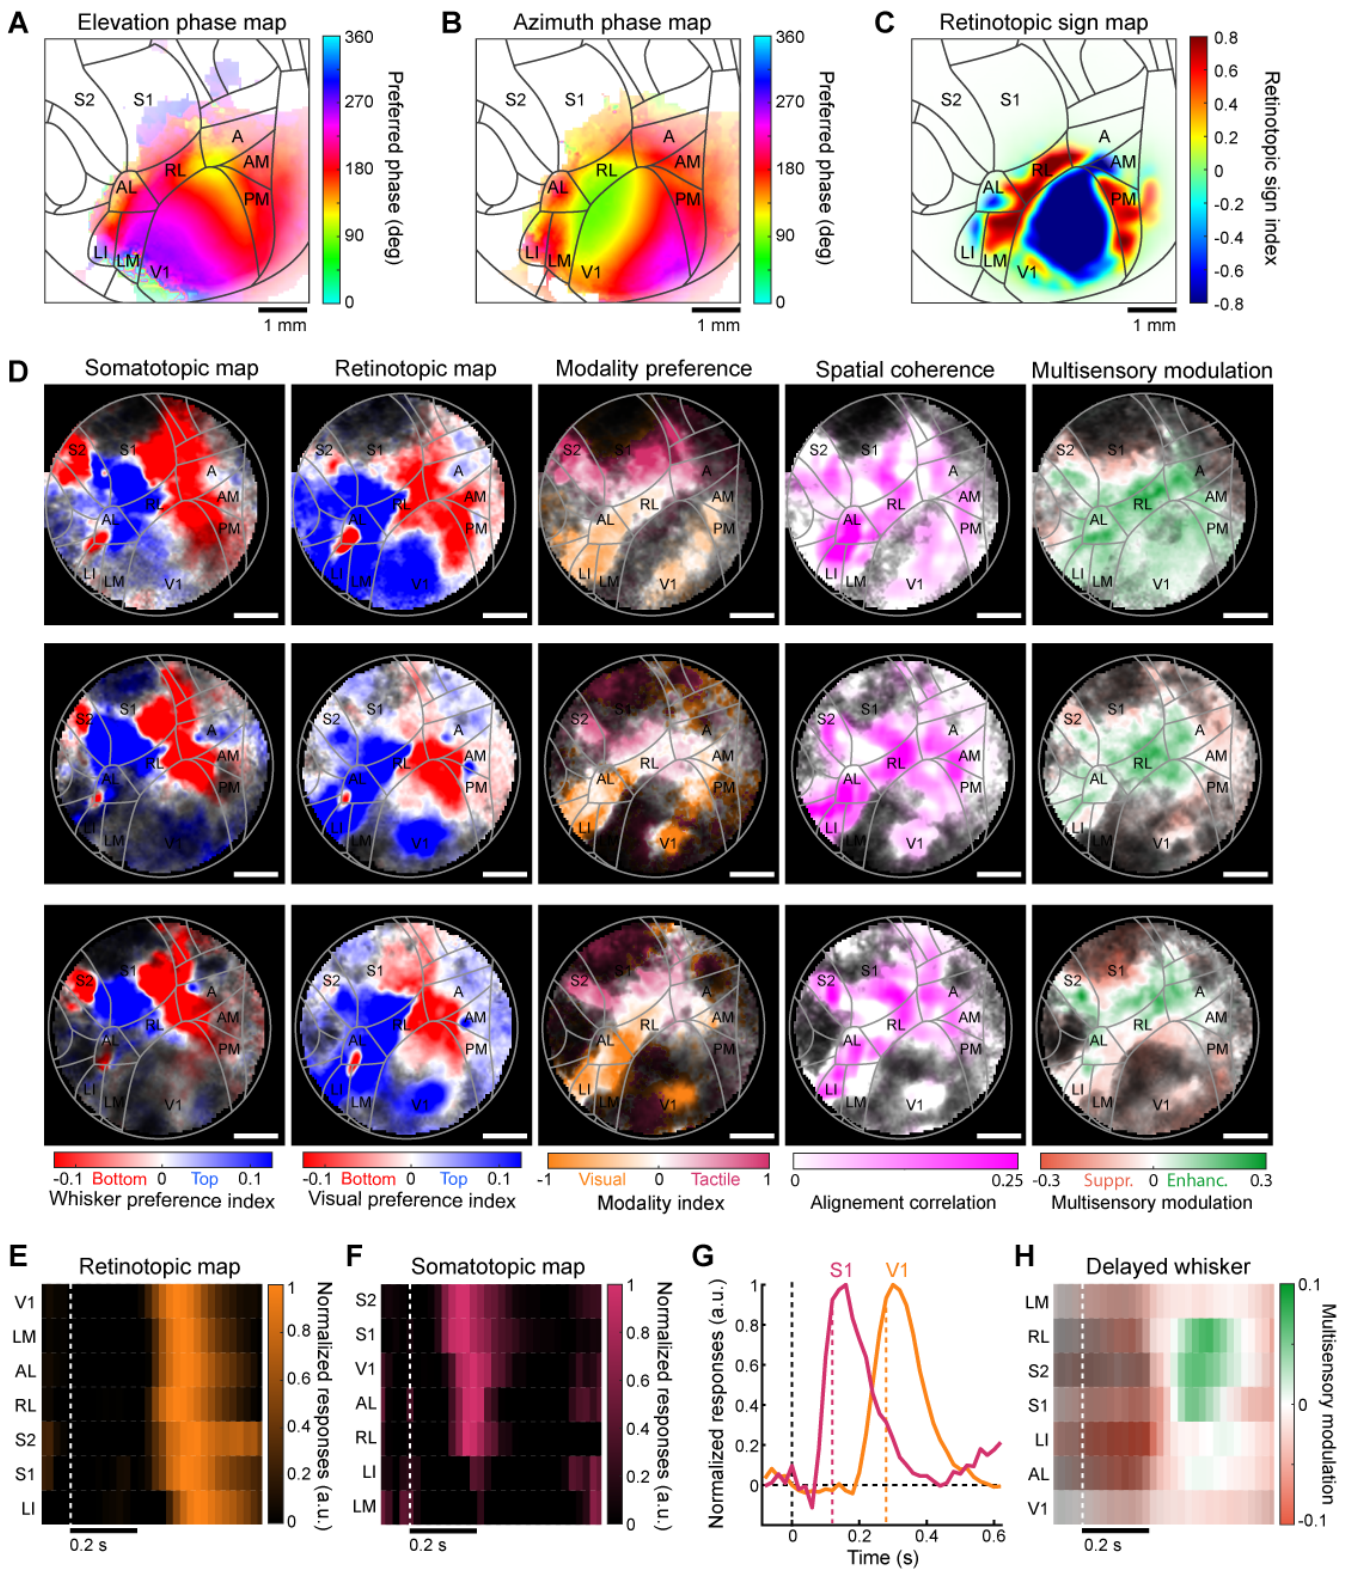

Figure S4

1347

1348

1349 **Fig. S4. Average phase maps for retinotopic mapping and examples of dynamic**  
1350 **visuo-tactile maps obtained with wide-field imaging.**

1351 **(A)** Elevation phase map average over mice (N=50 mice). Atlas and corresponding  
1352 areas labels are overlaid for reference. Pixels with low magnitude modulations are  
1353 displayed in white. **(B)** Azimuth phase map average over the same mice as in **A**. **(C)**  
1354 Retinotopic sign map computed based on the elevation and azimuth phase maps of **A**  
1355 and **B**. **(D)** Examples of visuo-tactile functional maps for 3 mice (rows). From left to  
1356 right: 1. Whisker preference map used to describe somatotopy in the vertical space  
1357 with red colors indicating preference for bottom whisker and blue colors indicating  
1358 preference for top whisker. 2. Visual position preference map used to describe  
1359 retinotopy in the vertical space. 3. Modality preference maps describing the dominant  
1360 modality in each pixel. 4. Spatial phase coherence maps between retinotopic and  
1361 somatotopic maps. 5. Multisensory modulation maps indicating areas with responses  
1362 enhancement or suppression for visuo-tactile stimuli. **(E)** Average activation time  
1363 course for each visually responsive area following stimulus onset (N=29 mice). **(F)**  
1364 Same as **E** for somatosensory responses in cortical areas evoked by whisker stimuli.  
1365 **(G)** Average response time course in the primary visual and whisker somatosensory  
1366 cortex highlighting an offset of about 150ms between the two modalities. **(H)**  
1367 Multisensory modulation computed over time in visuo-tactile areas in for responses  
1368 that are evoked simultaneously in the visual and somatosensory cortex.

1369

1370

1371

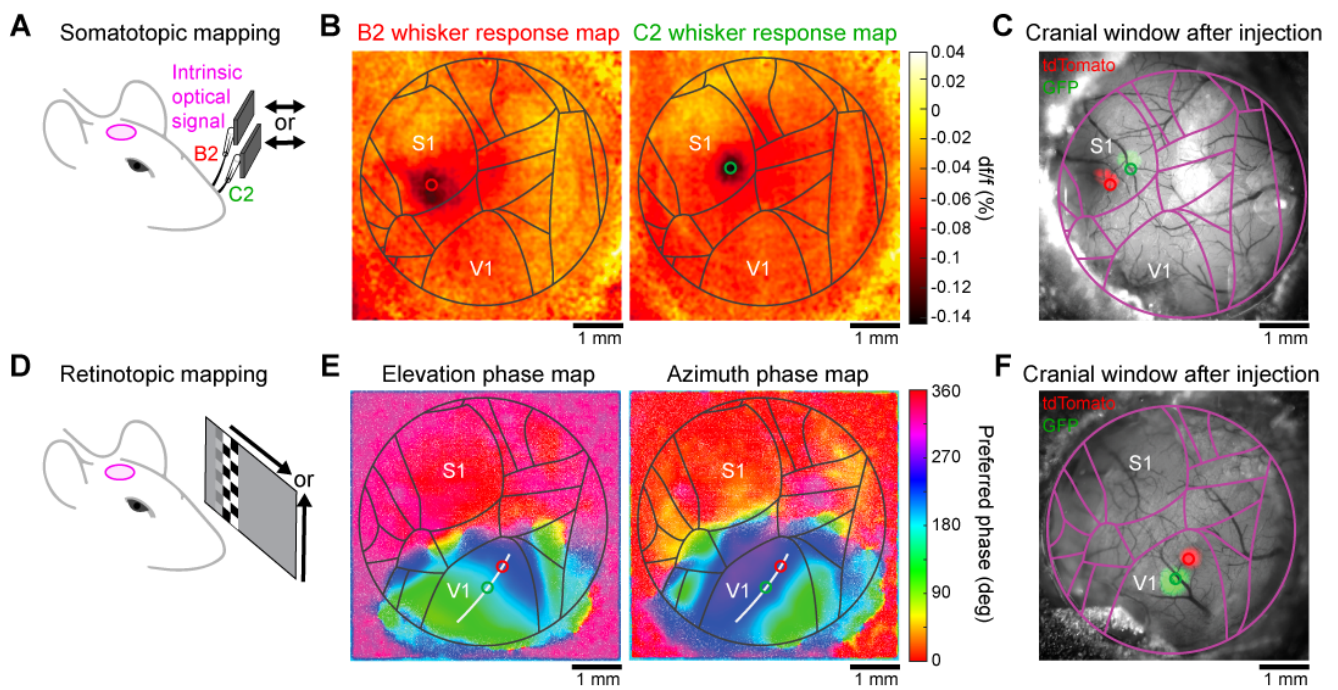

Figure S5

1372 **Fig. S5. Mapping two distinct vertical positions in the primary visual or whisker**  
1373 **somatosensory cortex.**

1374 **(A)** Schematic of the protocol for mapping whisker-responding areas in the dorsal  
1375 cortex. One of two whiskers is stimulated repeatedly during intrinsic optical signal  
1376 imaging. **(B)** Change in red light reflectance on the surface of the cortex measured  
1377 after averaging several trials of whisker stimulations relative to baseline. The left plot  
1378 reveals the barrel location for B2 whisker stimulations and the right plot for C2 whisker  
1379 stimulation. **(C)** Image of the cranial window several weeks after injection of viral  
1380 vectors to express GFP and tdTomato in two distinct parts of the whisker somatotopic  
1381 map. Locations of B2 and C2 barrels in S1 are indicated with circles overlaid on top of  
1382 the fluorescent signal where injections were done. **(D)** Schematic of the protocol for  
1383 retinotopic mapping in areas of the dorsal cortex. Horizontal or vertical bars drift across  
1384 the screen and they are textured with a flickering checkerboard pattern to elicit strong  
1385 cortical responses at different phases corresponding to the retinotopic preference. **(E)**  
1386 Retinotopic phase maps for elevation and azimuth on the dorsal cortex. These maps  
1387 are then used to identify a gradient across vertical dimension in an iso-profile along  
1388 the azimuth dimension. Two retinotopically distinct locations along the vertical axis are  
1389 identified and labeled for viral injection. **(F)** Image of the cranial window several weeks  
1390 after injection of viral vectors to express GFP and tdTomato in two distinct part of the  
1391 primary cortex retinotopic map. Locations where stereotaxic injections were performed  
1392 are indicated with circles overlaid on top of the fluorescent signal where injections  
1393 were done.

1394

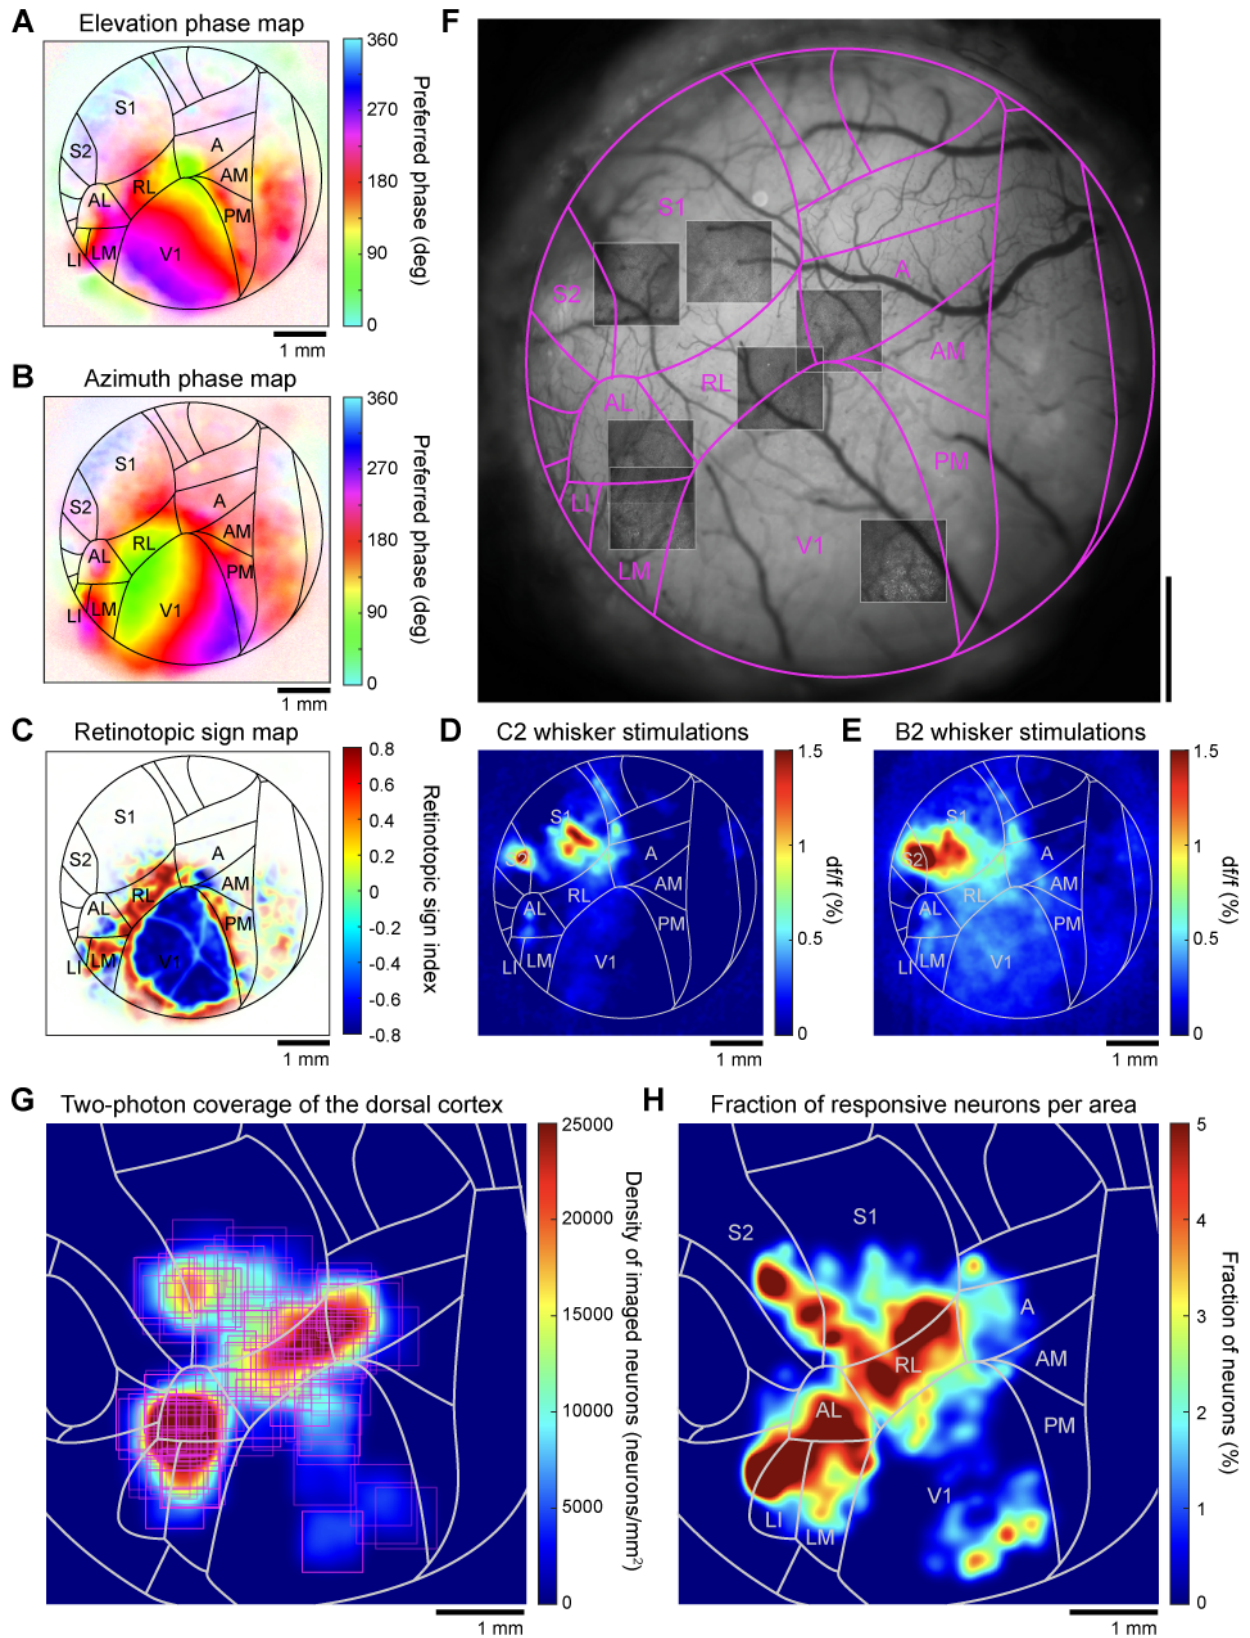

Figure S6

1395



1396 **Fig. S6. Coverage of large portions of the cranial window for characterizing**  
1397 **visuo-tactile responses at single-cell level using two-photon microscopy.**

1398 **(A-E)** Functional maps are first obtained to fit the Allen mouse atlas to precisely  
1399 localize neurons in their respective areas and to realign with a reference atlas. Visual  
1400 stimulation protocols are used to obtain phase maps for elevation **(A)** and azimuth **(B)**  
1401 in order to compute the retinotopic sign map **(C)**. Additionally, whisker stimulations  
1402 provide response maps for C2 **(D)** and B2 **(E)** whiskers. **(F)** Image obtained with wide-  
1403 field imaging where blood vessels are well distinguished. Atlas fitted with functional  
1404 maps is overlaid on the top in purple. For this mouse, 7 fields-of-view have been  
1405 imaged with two-photon imaging and placed on the surface of the cortex using blood  
1406 vessels pattern. **(G)** Coverage of visuo-tactile areas of the dorsal cortex with two-  
1407 photon imaging across mice. Using the realigned atlas and information about all  
1408 neuron's location, we can recreate a large-scale population using single-cell  
1409 information. We could collect N=134 fields-of-view across N=25 mice. **(H)** Percentage  
1410 of neurons imaged with two-photon microscopy that were responsive to at least one  
1411 stimulus condition. The areas of high responsivity are in accordance with the wide-  
1412 field imaging.

1413

1414

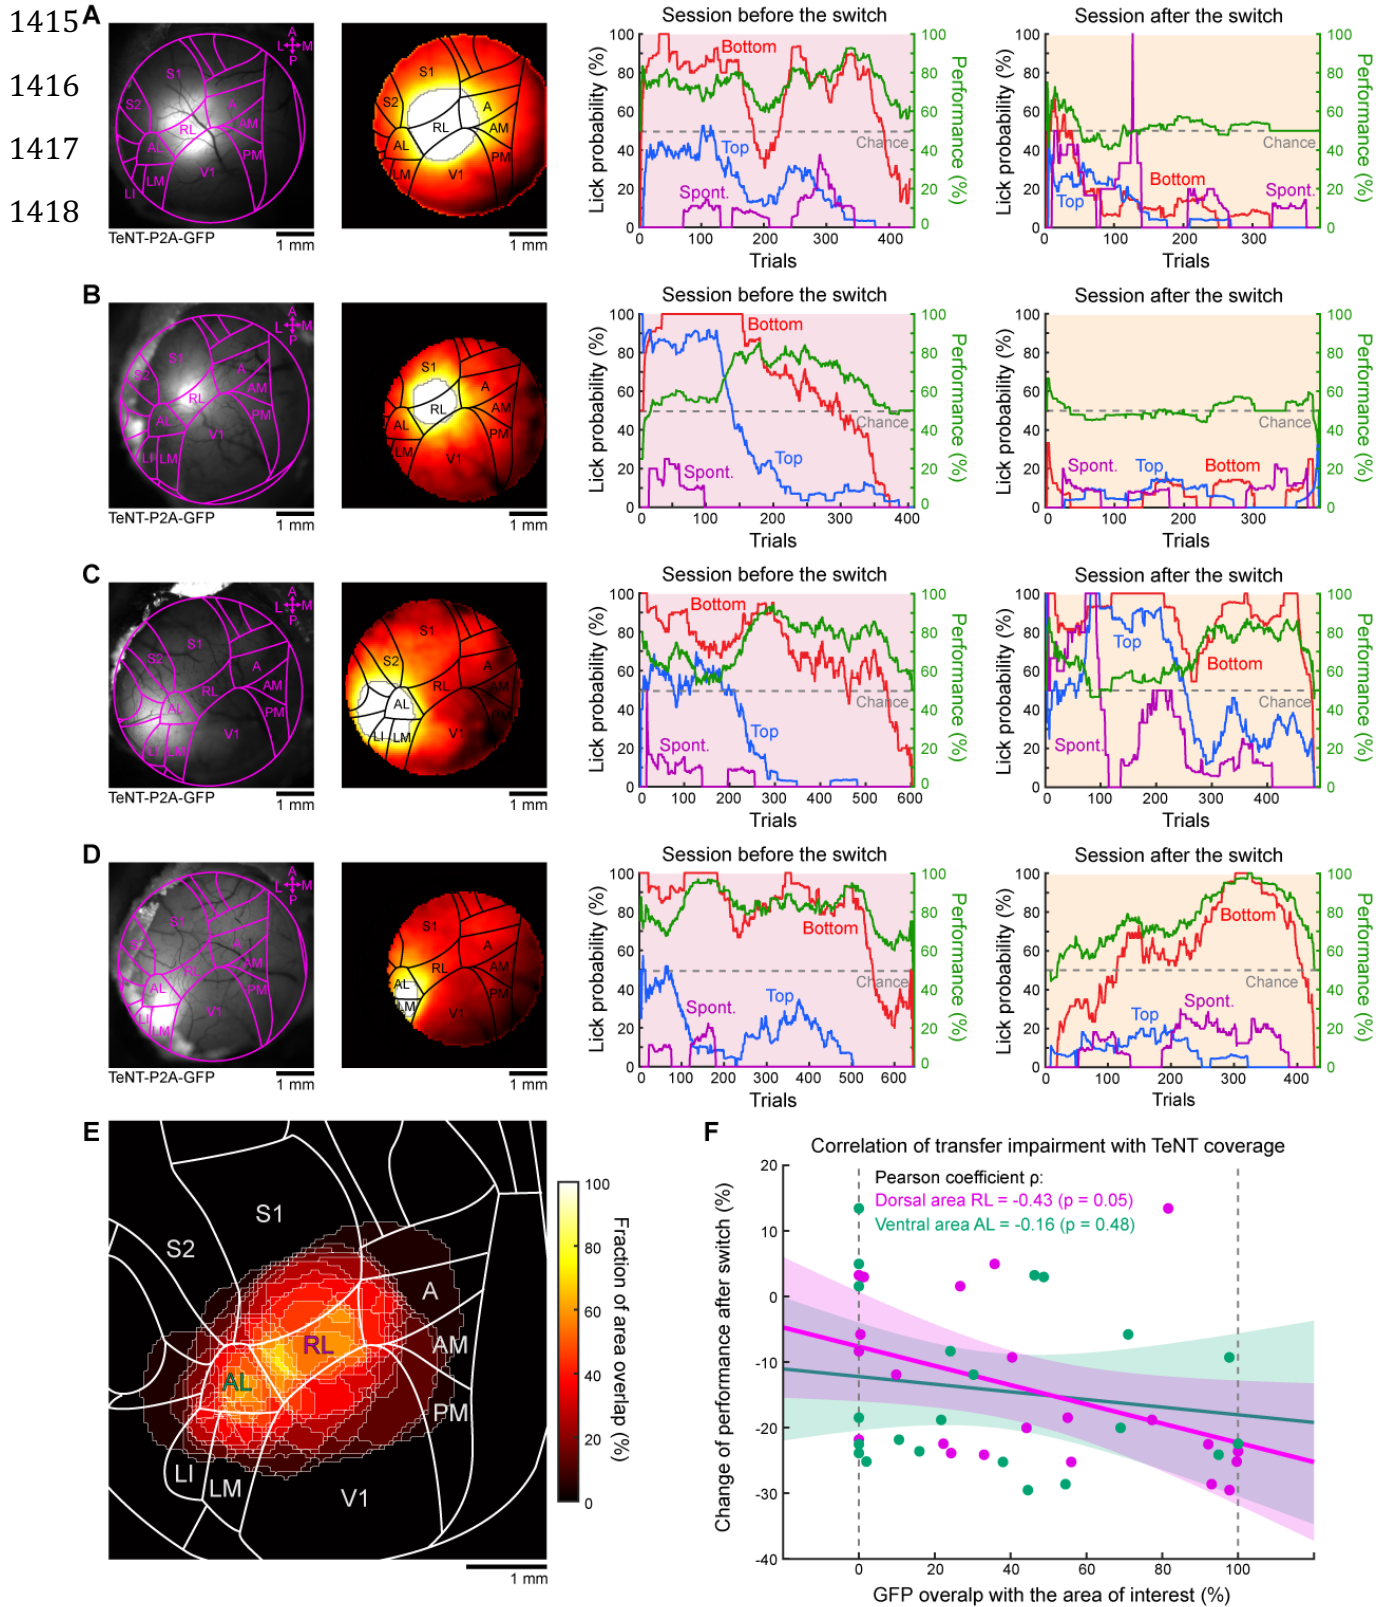

Figure S7

1419 **Fig. S7. Transfer learning impairment in relation with TeNT expression in**  
1420 **different associative areas of the dorsal cortex.**

1421 **(A)** Left: Example of TeNT-P2A-GFP expression pattern over the cranial window and  
1422 corresponding estimate of expression coverage after blood vessels subtraction. Right:  
1423 Effect of cortical silencing on transfer learning from tactile task to visual task. Here the  
1424 discrimination performance dropped at chance level after the switch. **(B-D)** Same as  
1425 **A** but for other example mice with injections in different locations of the cortex and  
1426 corresponding effect on transfer learning. **(E)** Overall coverage across all experiments  
1427 performed with this protocol. **(F)** Example of correlation between the level of GFP  
1428 overlap with a specific area (here RL or AL) and the corresponding effect on the  
1429 performance after switch. To obtain a more nuanced effect for the correlation, we  
1430 computed the performance changes over 3 consecutive days after switch (N=22 mice,  
1431 Pearson coefficient: -0.43,  $p=0.05$  for RL; Pearson coefficient: -0.16,  $p=0.48$  for AL).

1432
